# Supplementary material for: Natural Variation in Abiotic Stress Responsive Gene Expression and Local Adaptation to Climate in Arabidopsis thaliana
Source: Oxford University Press journal article supplement (doi:10.1093/molbev/msu170), 2014-05-21
Supplement: msu170_Supplementary_Data.zip [file msu170_Supplementary_Data.zip]

Archive with 2 entries (2 files):
- ExpressionClimate_suppl.MBE_R1.1.pdf
- LaskyMBE_TableS5.xlsx
