# Supplementary material for: Natural Variation in Abiotic Stress Responsive Gene Expression and Local Adaptation to Climate in Arabidopsis thaliana
Source: Oxford University Press journal article supplement (doi:10.1093/molbev/msu170), 2014-05-21
Supplement: msu170_Supplementary_Data.zip [file msu170_Supplementary_Data.zip › ExpressionClimate_suppl.MBE_R1.1.pdf]

1   **Supplemental Information**

2

3   For:

4

5   Natural variation in abiotic stress responsive gene expression and local adaptation  
6   to climate in *Arabidopsis thaliana*

7

8   Jesse R. Lasky, David L. Des Marais, David B. Lowry, Inna Povolotskaya, John  
9   K. McKay, James H. Richards, Timothy H. Keitt, and Thomas E. Juenger

10

11

12

## 13    **SUPPLEMENTAL METHODS**

14

### 15    *Climate data*

16    Hijmans et al. (2005) created WorldClim data by spatially interpolating 1950-  
17    2000 weather station data and resolving it to 30” grid squares. The authors  
18    (Hijmans et al. 2005) estimated mean monthly minimum, mean, and maximum  
19    temperatures and mean monthly precipitation averaged across years of the time  
20    period. Furthermore, Hijmans et al. (2005) derived variables of climatic extremes  
21    and variability.

22            We used Climate Research Unit (CRU) humidity and temperature data to  
23    approximate vapor pressure deficit (VPD), which is the difference between water  
24    vapor partial pressure and maximum potential pressure at a given air temperature,  
25    and indicates evaporative demand on plants (Johnson and Ferrell 1983). CRU data  
26    come from 1961-1990 weather station data that were subsequently interpolated to  
27    10’ resolution (New et al. 2002) .

28            We used a third database to estimate inter-annual variability in  
29    precipitation. The National Centers for Environmental Prediction (NCEP)  
30    generated Reanalysis data on a T62 grid (resolution ~ 210 km) for the years 1948-  
31    2009 (data provided by NOAA/OAR/ESRL PSD, <http://www.esrl.noaa.gov/psd/> )  
32    (Kalnay et al. 1996). We used monthly surface precipitation rates to calculate  
33    each calendar month’s coefficient of variation (CV) across years (Lasky et al.

34 2012).

35

36 **Growing season climate** – We previously used temperature and precipitation  
37 data to model the months of the year when accessions may be growing (climate  
38 diagram model) (Walter and Lieth 1960; Lasky et al. 2012). Putative growing  
39 months were specified as all months having abundant soil moisture and mean  
40 temperature  $\geq 4^{\circ}\text{C}$ . We considered soil moisture to be abundant in a given month  
41 if mean precipitation (mm)  $\geq 2 * \text{mean temperature } (^{\circ}\text{C})$  (Walter and Lieth 1960).

42 We used growing season predictions to calculate growing season climate  
43 conditions for each accession, consisting of mean values of monthly precipitation,  
44 VPD, and minimum and mean temperature. We also calculated the CV of mean  
45 monthly precipitation within the growing season and the mean inter-annual CV of  
46 growing season month's precipitation.

47 We selected eleven climate variables we hypothesized would represent  
48 selective gradients due to drought and cold stress in order to test for SNP-climate  
49 associations. Six climate variables described the growing season: 1) mean  
50 monthly precipitation, 2) coefficient of variation (CV) of mean monthly  
51 precipitation, 3) mean VPD at mean monthly conditions, 4) mean inter-annual CV  
52 of mean monthly precipitation, 5) mean monthly mean temperature, and 6) mean  
53 monthly minimum temperature. Five variables described yearlong climate  
54 conditions: 1) CV of mean monthly precipitation, 2) isothermality (average

55 diurnal temperature range / annual range), 3) standard deviation (SD) of monthly  
56 temperature, 4) minimum temperature of coldest month, and 5) annual  
57 temperature range.

58

59 *Association studies of climate and fitness under acclimation to abiotic stress*

60 **Mixed model** - We used the Efficient Mixed-Model Association (EMMA)  
61 mapping linear mixed model (Kang et al. 2008) to test SNP associations with  
62 climate and fitness in new GWAS (*i.e.* not previously published). EMMA  
63 includes a kinship random effect to attempt to control for population structure.  
64 Hancock *et al.* (2011) previously used non-parametric partial Mantel tests for  
65 SNP-climate association tests to reduce the influence of accessions occupying  
66 outlier climates. We chose not to use partial Mantel tests, which use permutations  
67 to generate null distributions, because Mantel permutations may be poor null  
68 models for data heavily influenced by spatially autocorrelated processes (e.g.  
69 climatic gradients, population structure, Raufaste and Rousset 2001; Goslee and  
70 Urban 2007; Guillot and Rousset 2013). Partial Mantel tests of climate-SNP  
71 associations by Hancock et al. (2011) generated extremely high numbers of  
72 associations with the lowest possible *p*-value, which the authors hypothesized  
73 indicates that these tests performed poorly at controlling for population structure.  
74 Instead, we used EMMA, and culled accessions from each analysis that we  
75 identified as outliers by visually inspecting climate histograms (Figures S10-S12).

76 In contrast to a partial Mantel results (Hancock et al. 2011), our quantile-quantile  
77 plots compared theoretical and observed test statistics (Figures S6-S9) indicate  
78 our models follow the null much more closely, albeit with small enrichments of  
79 strong associations (low p-values) as expected if a small number of loci are  
80 involved in local adaptation. For example, we found between a 1- and 7-fold  
81 enrichment of SNPs in the lower 0.001 p-value tail compared to the null  
82 expectation; in contrast to the 156- to 368-fold enrichment found by Hancock et  
83 al. (2011). The lack of a large enrichment of low p-values in our mixed model  
84 approach signifies that our model is likely controlling for the large portion of  
85 population structure that is collinear with climate (Lasky et al. 2012). Note that  
86 this approach is highly conservative because we expect that a portion of the  
87 genome-wide divergence between populations captured by the kinship matrix will  
88 be caused by local adaptation to climate.

89 We used EMMA to test the null hypothesis that the mean climate  
90 inhabited by accessions with one allele was equal to the mean climate inhabited  
91 by the alternative allele, while controlling for population structure (Kang et al.  
92 2008; Yoder et al. 2014). In fitness association tests, we tested the null hypothesis  
93 that the fitness of accessions with one allele was equal to the fitness of the  
94 alternative allele. Formally stated

$$95 \quad y = X\beta + u + e \quad (\text{eqn. 1})$$

96 where  $y$  is the  $n \times 1$  vector of observed climate data for each accession (total of  $n$

97 accessions). For association mapping with fitness,  $y$  was a vector of accession  
 98 fitness data.  $X$  is an  $n \times q$  matrix of data for  $q$  fixed effects, consisting of intercept  
 99 and SNP effects.  $\beta$  is a  $q \times 1$  vector giving the slope of the fixed effects. The  $u$   
 100 term gives the random error due to kinship

$$101 \quad Var(u) = \sigma_g^2 K \quad (\text{eqn. 2})$$

102 with  $K$  being the  $n \times n$  kinship matrix. The  $e$  term gives the random error of each  
 103 accession

$$104 \quad Var(e) = \sigma_e^2 I \quad (\text{eqn. 3}).$$

105 The kinship matrix was constructed using identity in-state of SNPs (Kang et al.  
 106 2008). The significance of SNP-climate or SNP-fitness relationships,  $\beta_l$ , was  
 107 assessed using t-tests, the  $p$ -values of which indicate the significance of SNP  
 108 associations to climate or fitness (Kang et al. 2008).

109 All climate variables were scaled to have a mean of 0 and a standard  
 110 deviation of 1. Survival data were arcsin square-root transformed in order to  
 111 improve normality. Only SNPs with a minor allele frequency greater than 0.1  
 112 among tested accessions were analyzed in order to avoid spurious significant  
 113 associations (Atwell et al. 2010).

114

115 **GWAS stratified by flowering time** – The study of Des Marais *et al.* (2012),  
 116 which provided our drought stress gene expression data, split microarray

117 experiments into early and late-flowering groups of accessions (in the absence of  
118 vernalization) because flowering time groups may have varied phenology and  
119 life-history that affects response to abiotic stress (McKay et al. 2003; Donohue  
120 2005; Korves et al. 2007). We followed Des Marais *et al.* (2012) and our previous  
121 study (Lasky et al. 2012), conducting a subset of GWAS on putative early and  
122 late-flowering groups.

123       Because flowering time data were only available for 476 of the 1,307  
124 accessions with genomic data, in the previous study we used data from the 476 to  
125 predict flowering time variation in the remaining accessions (Lasky et al. 2012) .  
126 Methods are described in greater detail in Lasky *et al.* (2012). We used data from  
127 13 common garden experiments in different environments, all without  
128 vernalization (Table S10, Figure S4) (Shindo et al. 2005; Zhao et al. 2007; Atwell  
129 et al. 2010; Li et al. 2010; Kenney 2012) because vernalization accelerates the  
130 flowering of late-flowering putative winter annuals, which would have limited our  
131 ability to distinguish life history variation (Stinchcombe et al. 2004). We then  
132 used these empirical flowering time data to categorize accessions using a SNP-  
133 based model of flowering-time category for accessions lacking data.

134       For the flowering time model, we used candidate SNPs identified in the  
135 original flowering time association studies (Atwell et al. 2010; Li et al. 2010) and  
136 SNPs within 100 kb of *FRI* and *FLC*, two interacting genes in the vernalization-  
137 sensitivity pathway (Michaels and Amasino 1999; Stinchcombe et al. 2004; Zhao

et al. 2007), giving 857 total SNPs as predictor variables (SNP data from Horton et al. 2012). We modeled flowering category with support vector machines (SVM), a type of classification model flexible enough to deal with interaction and non-linear effects. SVM based on predictor SNPs and empirical flowering time categories predicted a total of 765 early-flowering and 248 late-flowering accessions of the 1,003 accessions used in climate association mapping. We previously experimentally validated flowering time categories predicted using SVM and found our predictions were correct for 24 of 27 accessions (89%) previously lacking flowering time data (Lasky et al. 2012). Although there are limitations to predicting flowering time from genotype, the included experiments span a variety of environments and thus we believe our categories capture ecologically important flowering time variation.

150

#### 151 *Enrichment of genes with expression plasticity*

We assessed whether genes having abiotic stress treatment effects (eSR) or accession by treatment effects (eGEI) on expression were more likely than randomly selected genes to have SNPs associated with signatures of selection, climate and fitness. In enrichment tests, we tested null hypotheses stating, in essence, that SNPs near eSR and eGEI genes had equal climate, fitness, and selection statistics as did SNPs from randomly chosen genes. We used a permutation enrichment test based on that of Segrè et al. (2010). The test

159 compares the proportion of candidate genes (eSR or eGEI genes) having nearby  
160 SNPs with strong associations to the proportion of randomly selected genes  
161 having nearby SNPs with strong associations (Figure S3). Typically, existing  
162 methods link to a gene all SNPs within a window of a defined number of base  
163 pairs of the gene's coding region (e.g. Segrè et al. 2010; Cabrera et al. 2012).  
164 However, recombination rates and linkage disequilibrium (LD) in diverse  
165 genotype panels vary extensively across the Arabidopsis genome (Horton et al.  
166 2012). Thus the information a SNP contains about variation in nearby genes a  
167 given distance away is highly heterogeneous across the genome. In order to  
168 account for this heterogeneity, we used an adaptive window based on local rates  
169 of LD to link SNP association signals to nearby genes (SNP data from Horton et  
170 al. 2012). We identified a window surrounding genes where the smoothed average  
171 minimum correlation between SNPs (Pearson's  $r$ ) was greater than 0.3. We first  
172 averaged the maximum distance where  $r > 0.3$  from each SNP with the two  
173 neighboring SNPs on either side. We then averaged those distances for all SNPs  
174 within 5 kb of the coding region of each gene to get the linkage window for each  
175 gene. If there were no SNPs within 5 kb, we set the linkage window for a gene as  
176 the average linkage distance for the nearest SNP.

177         In order to calculate the enrichment test statistic for climate and fitness  
178 associations, we first found the lowest association  $p$ -value among SNPs linked to  
179 each gene in the candidate list (eSR or eGEI genes). If a single SNP had the

lowest  $p$ -value for multiple genes, then the SNP was only included once in the candidate list. Typically, >90% genes had a unique SNP having the lowest  $p$ -value for that gene (*i.e.* the low  $p$ -value SNP was not the low  $p$ -value SNP for an additional gene). Next, we calculated the 5<sup>th</sup> percentile of  $p$ -values for all SNPs of a particular association study. We then found the proportion of candidate SNP  $p$ -values falling below the 5<sup>th</sup> percentile and considered this proportion the observed enrichment test statistic. For direct comparisons of eSR and eGEI enrichments we calculated the difference between gene lists (eSR – eGEI) in their proportion of genes falling in the 5<sup>th</sup> percentile  $p$ -values.

We then created a null distribution by permuting gene classifications as eSR, eGEI or neither circularly around the genome 10,000 times in order to maintain LD patterns and the number of genes in each category (excluding the same genes that were excluded in analyses of microarrays described above). For each random gene set we calculated a test statistic in the same way as the observed test statistic. We then compared observed test statistics to permuted test statistics. Finally, we conducted a two-tailed permutation-based hypothesis test because gene lists might be biased toward many or few strong SNP associations to climate and fitness and selection statistics. To conduct the two-tailed test we determined the proportion of random sets with a test statistic in the tail beyond our observed statistic and doubled this proportion to get a two-tailed permutation  $p$ -value. This was the  $p$ -value for the null hypothesis that the stress responsive

201 candidate genes co-occurred randomly with respect to strong SNP associations  
 202 (Segrè et al. 2010).

203

204 *Promoter motif polymorphisms from resequencing data*

205 We quantified ABRE and DRE/CBF motifs across the 1000 bp promoters of the  
 206 first 80 genomes of the 1001 Arabidopsis genomes project (Cao et al. 2011).  
 207 Quantification of the number of motifs was conducted on the transcribed strand  
 208 with custom perl scripts. Based on past studies, we counted ABRE type motifs  
 209 only in the 5' to 3' orientation with the transcribed gene (Zhang et al. 2005;  
 210 Maruyama et al. 2012; Fujita et al. 2013). In contrast, DRE/CBF type motifs have  
 211 been show to be functional in both the 5' to 3' and 3' to 5' orientations (Geisler et  
 212 al. 2006) and so we counted them in both directions.

213 For each gene set, we tested whether each motif showed differences in  
 214 frequency among accessions or in variance of frequency compared to random  
 215 genes. We tested the aggregated enrichment of gene lists for all motif variants of  
 216 the same core using the test statistic of O'Brien (1984). The O'Brien (1984)  
 217 method allows calculation of a non-parametric statistic for multivariate responses  
 218 (here the multiple variants of each core motif). For each gene, we calculated the  
 219 mean frequency and variance in frequency of the motif among of accessions (out  
 220 of 80). We then ranked the mean frequency and variance in frequency of each  
 221 gene and averaged across motif variants to get a statistic for each gene. For

222 variance in frequency we only included motif-gene combinations where at least  
223 one accession had the motif. Because different motif variants differed widely in  
224 genome-wide occurrence, the number of genes with missing variance  
225 observations differed widely among motif variants. Thus for variance in  
226 frequency, we standardized ranks to mean zero and unit standard deviation for  
227 each motif variant in order to balance the influence of different motif variants. For  
228 each gene list, we then calculated an observed enrichment as the mean gene-level  
229 statistic. Observed statistics were compared to 10,000 circular permutations of  
230 gene list categories.

231       We also conducted tests of gene list enrichment with each motif variant  
232 individually. For these tests, we calculated observed enrichment as on raw  
233 frequency and variance in frequency data (in contrast to rank values used above)  
234 averaged across genes in the gene list. Observed statistics were compared to  
235 10,000 circular permutations of gene list categories (results shown in Tables S7 &  
236 S9).

237

## 238 **RESULTS**

239

### 240 *Climate association enrichments for combined flowering time categories*

241 Among accessions of both flowering time categories combined, drought eGEI  
242 genes were most strongly associated with intra-annual CV of monthly

precipitation ( $z = 2.97$ ,  $p = 0.0036$ ; Table S2). By contrast, drought eSR genes had a significantly low proportion of SNPs associated with mean monthly growing season precipitation ( $z = -2.06$ ,  $p = 0.0412$ ). Cold eGEI genes were most significantly enriched for SNP associations with the standard deviation of monthly temperature ( $z = 2.12$ ,  $p = 0.0316$ ; Table S2). Cold eSR genes, even more so than drought eSR genes, tended to have fewer associations to temperature climatic variables. Cold eSR genes had significantly fewer SNP associations with mean growing season temperature ( $z = -2.29$ ,  $p = 0.0224$ ) and monthly minimum growing season temperature compared to genomic controls ( $z = -2.07$ ,  $p = 0.0404$ ). In direct comparison with eGEI genes, eSR genes had tended to have fewer SNP associations with climate, significantly for SD of monthly temperature ( $z = -2.58$ ,  $p = 0.0064$ ), CV of monthly precipitation ( $z = -2.41$ ,  $p = 0.0166$ ) and CV of monthly growing season precipitation ( $z = -2.04$ ,  $p = 0.0406$ , Table S2).

256

## 257 **References**

- 258 Atwell S, Huang YS, Vilhjalmsen BJ, et al. 2010. Genome-wide association  
259 study of 107 phenotypes in *Arabidopsis thaliana* inbred lines. *Nature*  
260 465:627–631.
- 261 Cabrera CP, Navarro P, Huffman JE, et al. 2012. Uncovering Networks from  
262 Genome-Wide Association Studies via Circular Genomic Permutation. *G3*  
263 GenesGenomesGenetics 2:1067–1075.
- 264 Cao J, Schneeberger K, Ossowski S, et al. 2011. Whole-genome sequencing of  
265 multiple *Arabidopsis thaliana* populations. *Nat Genet* 43:956–963.
- 266 Donohue K. 2005. Niche construction through phenological plasticity: life history

267 dynamics and ecological consequences. *New Phytol.* 166:83–92.

268 Fujita Y, Yoshida T, Yamaguchi-Shinozaki K. 2013. Pivotal role of the  
269 AREB/ABF-SnRK2 pathway in ABRE-mediated transcription in response  
270 to osmotic stress in plants. *Physiol. Plant.* 147:15–27.

271 Geisler M, Kleczkowski LA, Karpinski S. 2006. A universal algorithm for  
272 genome-wide in silico identification of biologically significant gene  
273 promoter putative cis-regulatory-elements; identification of new elements  
274 for reactive oxygen species and sucrose signaling in *Arabidopsis*. *Plant J.*  
275 45:384–398.

276 Goslee SC, Urban DL. 2007. The ecodist package for dissimilarity-based analysis  
277 of ecological data. *J. Stat. Softw.* 22:1–19.

278 Guillot G, Rousset F. 2013. Dismantling the Mantel tests. *Methods Ecol. Evol.*  
279 4:336–344.

280 Hancock AM, Brachi B, Faure N, Horton MW, Jarymowycz LB, Sperone FG,  
281 Toomajian C, Roux F, Bergelson J. 2011. Adaptation to Climate Across  
282 the *Arabidopsis thaliana* Genome. *Science* 334:83–86.

283 Hijmans RJ, Cameron SE, Parra JL, Jones PG, Jarvis A. 2005. Very high  
284 resolution interpolated climate surfaces for global land areas. *Int. J.*  
285 *Climatol.* 25:1965–1978.

286 Horton MW, Hancock AM, Huang YS, et al. 2012. Genome-wide patterns of  
287 genetic variation in worldwide *Arabidopsis thaliana* accessions from the  
288 RegMap panel. *Nat Genet* 44:212–216.

289 Johnson JD, Ferrell WK. 1983. Stomatal response to vapour pressure deficit and  
290 the effect of plant water stress. *Plant Cell Environ.* 6:451–456.

291 Kalnay E, Kanamitsu M, Kistler R, et al. 1996. The NCEP/NCAR 40-Year  
292 Reanalysis Project. *Bull. Am. Meteorol. Soc.* 77:437–471.

293 Kang HM, Zaitlen NA, Wade CM, Kirby A, Heckerman D, Daly MJ, Eskin E.  
294 2008. Efficient Control of Population Structure in Model Organism  
295 Association Mapping. *Genetics* 178:1709–1723.

296 Kenney AM. 2012. Evolutionary genetics and ecology of water use efficiency  
297 ( $[\delta]^{13}\text{C}$ ) in *Ipomopsis aggregata* and *Arabidopsis thaliana*.

298 Korves TM, Schmid KJ, Caicedo AL, Mays C, Stinchcombe JR, Purugganan MD,  
 299 Schmitt J. 2007. Fitness Effects Associated with the Major Flowering  
 300 Time Gene FRIGIDA in *Arabidopsis thaliana* in the Field. *Am. Nat.*  
 301 169:E141–E157.

302 Lasky JR, Des Marais DL, McKay JK, Richards JH, Juenger TE, Keitt TH. 2012.  
 303 Characterizing genomic variation of *Arabidopsis thaliana*: the roles of  
 304 geography and climate. *Mol. Ecol.* 21:5512–5529.

305 Li Y, Huang Y, Bergelson J, Nordborg M, Borevitz JO. 2010. Association  
 306 mapping of local climate-sensitive quantitative trait loci in *Arabidopsis*  
 307 *thaliana*. *Proc. Natl. Acad. Sci.* 107:21199–21204.

308 Maruyama K, Todaka D, Mizoi J, et al. 2012. Identification of Cis-Acting  
 309 Promoter Elements in Cold- and Dehydration-Induced Transcriptional  
 310 Pathways in *Arabidopsis*, Rice, and Soybean. *DNA Res.* 19:37–49.

311 McKay JK, Richards JH, Mitchell-Olds T. 2003. Genetics of drought adaptation  
 312 in *Arabidopsis thaliana*: I. Pleiotropy contributes to genetic correlations  
 313 among ecological traits. *Mol. Ecol.* 12:1137–1151.

314 Michaels SD, Amasino RM. 1999. FLOWERING LOCUS C Encodes a Novel  
 315 MADS Domain Protein That Acts as a Repressor of Flowering. *Plant Cell*  
 316 Online 11:949–956.

317 New M, Lister D, Hulme M, Makin I. 2002. A high-resolution data set of surface  
 318 climate over global land areas. *Clim. Res.* 21:1–25.

319 O’Brien PC. 1984. Procedures for Comparing Samples with Multiple Endpoints.  
 320 *Biometrics* 40:1079–1087.

321 Raufaste N, Rousset F. 2001. Are partial Mantel tests adequate? *Evolution*  
 322 55:1703–1705.

323 Segrè AV, Groop L, Mootha VK, Daly MJ, Altshuler D, DIAGRAM Consortium,  
 324 MAGIC investigators. 2010. Common Inherited Variation in  
 325 Mitochondrial Genes Is Not Enriched for Associations with Type 2  
 326 Diabetes or Related Glycemic Traits. *PLoS Genet* 6:e1001058.

327 Shindo C, Aranzana MJ, Lister C, Baxter C, Nicholls C, Nordborg M, Dean C.  
 328 2005. Role of FRIGIDA and FLOWERING LOCUS C in Determining  
 329 Variation in Flowering Time of *Arabidopsis*. *Plant Physiol* 138:1163–  
 330 1173.

331 Stinchcombe JR, Weinig C, Ungerer M, Olsen KM, Mays C, Halldorsdottir SS,  
332 Purugganan MD, Schmitt J. 2004. A latitudinal cline in flowering time in  
333 *Arabidopsis thaliana* modulated by the flowering time gene *FRIGIDA*.  
334 *Proc. Natl. Acad. Sci. U. S. A.* 101:4712–4717.

335 Walter H, Lieth H. 1960. *Klimadiagramm-Weltatlas*. Gustav Fisch. Jena 8000.

336 Yoder JB, Stanton-Geddes J, Zhou P, Briskine R, Young ND, Tiffin P. 2014.  
337 Genomic Signature of Adaptation to Climate in *Medicago truncatula*.  
338 *Genetics* [Internet]. Available from:  
339 [http://www.genetics.org/content/early/2014/01/15/genetics.113.159319.ab](http://www.genetics.org/content/early/2014/01/15/genetics.113.159319.abstract)  
340 [stract](http://www.genetics.org/content/early/2014/01/15/genetics.113.159319.abstract)

341 Zhang W, Ruan J, Ho TD, You Y, Yu T, Quatrano RS. 2005. Cis-regulatory  
342 element based targeted gene finding: genome-wide identification of  
343 abscisic acid- and abiotic stress-responsive genes in *Arabidopsis thaliana*.  
344 *Bioinformatics* 21:3074–3081.

345 Zhao K, Aranzana MJ, Kim S, et al. 2007. An *Arabidopsis* Example of  
346 Association Mapping in Structured Samples. *PLoS Genet* 3:e4.

347

348

349

350

## 351 Tables

352 **Table S1.** Results for enrichment tests with selection statistics. Enrichments  
 353 (frequency of genes in list having SNPs in the 5<sup>th</sup> percentile of test selection  
 354 statistics) are calculated as a z-score using the distribution from null permutations.  
 355 Gene lists with significant enrichment of selection statistics are shown in bold.  
 356 Tests were not stratified by flowering time because selection statistics were  
 357 calculated on a panel with both types [2].

| <i>Selection statistic</i> | <i>Gene list</i> | <i>Abiotic stress</i> | <i>Mean (enrichment z-score)</i> | <i>Permutation test p</i> |
|----------------------------|------------------|-----------------------|----------------------------------|---------------------------|
| PHS                        | eSR              | Cold                  | 2.38                             | <b>0.0258</b>             |
|                            | eSR              | Drought               | 2.57                             | <b>0.0198</b>             |
|                            | eGEI             | Cold                  | -1.42                            | 0.1526                    |
|                            | eGEI             | Drought               | -0.21                            | 0.8384                    |
|                            | eSR - eGEI       | Cold                  | 2.38                             | <b>0.0120</b>             |
|                            | eSR - eGEI       | Drought               | 1.13                             | 0.2596                    |
| CLR                        | eSR              | Cold                  | 0.86                             | 0.3938                    |
|                            | eSR              | Drought               | 1.14                             | 0.2518                    |
|                            | eGEI             | Cold                  | -0.41                            | 0.6720                    |
|                            | eGEI             | Drought               | 0.31                             | 0.7520                    |
|                            | eSR - eGEI       | Cold                  | 0.71                             | 0.4766                    |
|                            | eSR - eGEI       | Drought               | 0.02                             | 0.9914                    |
| F <sub>st</sub>            | eSR              | Cold                  | 0.54                             | 0.5928                    |
|                            | eSR              | Drought               | 0.29                             | 0.7652                    |
|                            | eGEI             | Cold                  | -1.16                            | 0.2402                    |
|                            | eGEI             | Drought               | 2.46                             | <b>0.0142</b>             |
|                            | eSR - eGEI       | Cold                  | 1.37                             | 0.1692                    |
|                            | eSR - eGEI       | Drought               | -2.30                            | <b>0.0258</b>             |
| MAF                        | eSR              | Cold                  | -4.18                            | <b>&lt;0.0002</b>         |
|                            | eSR              | Drought               | -2.43                            | <b>0.0168</b>             |
|                            | eGEI             | Cold                  | 1.66                             | 0.1002                    |
|                            | eGEI             | Drought               | 1.96                             | <b>0.0434</b>             |
|                            | eSR - eGEI       | Cold                  | -3.10                            | <b>0.0022</b>             |
|                            | eSR - eGEI       | Drought               | -2.62                            | <b>0.0106</b>             |

358 **Table S2.** Results for enrichment tests with climate associations. The enrichment  
359 of candidate gene sets with associations to cold-related climate variables.  
360 Enrichments (frequency of genes in list having SNPs in the 5<sup>th</sup> percentile for *p*-  
361 values) are calculated as a z-score using the distribution from null permutations.  
362 Gene lists with significant enrichment of climate variables are shown in bold.

| <i>Accessions</i> | <i>Climate variable</i>                         | <i>Gene list</i> | <i>Abiotic stress</i> | <i>Frequency of significant SNPs z-score</i> | <i>Permutation test p</i> |
|-------------------|-------------------------------------------------|------------------|-----------------------|----------------------------------------------|---------------------------|
| All               | Isothermality                                   | eSR              | Cold                  | -0.044                                       | 0.9516                    |
| All               | SD monthly temperature                          | eSR              | Cold                  | -1.401                                       | 0.1650                    |
| All               | Minimum temperature of coldest month            | eSR              | Cold                  | -0.866                                       | 0.3882                    |
| All               | Temperature annual range                        | eSR              | Cold                  | -0.597                                       | 0.5534                    |
| All               | Mean growing season temperature                 | eSR              | Cold                  | -2.287                                       | <b>0.0224</b>             |
| All               | Mean monthly minimum growing season temperature | eSR              | Cold                  | -2.073                                       | <b>0.0404</b>             |
| All               | CV monthly precipitation                        | eSR              | Drought               | 1.607                                        | 0.1170                    |
| All               | Mean monthly growing season precipitation       | eSR              | Drought               | -2.061                                       | <b>0.0412</b>             |
| All               | CV monthly growing season precipitation         | eSR              | Drought               | -0.549                                       | 0.5736                    |
| All               | Mean growing season VPD                         | eSR              | Drought               | -0.063                                       | 0.9298                    |
| All               | Inter-annual CV of growing season precipitation | eSR              | Drought               | -0.107                                       | 0.9234                    |
| All               | Isothermality                                   | eGEI             | Cold                  | -1.412                                       | 0.1538                    |
| All               | SD monthly temperature                          | eGEI             | Cold                  | 2.123                                        | <b>0.0316</b>             |
| All               | Minimum temperature of coldest month            | eGEI             | Cold                  | 0.615                                        | 0.5372                    |
| All               | Temperature annual range                        | eGEI             | Cold                  | 1.598                                        | 0.1132                    |
| All               | Mean growing season temperature                 | eGEI             | Cold                  | 0.444                                        | 0.6474                    |
| All               | Mean monthly minimum growing season temperature | eGEI             | Cold                  | -0.641                                       | 0.5178                    |
| All               | CV monthly precipitation                        | eGEI             | Drought               | 2.968                                        | <b>0.0036</b>             |
| All               | Mean monthly growing season precipitation       | eGEI             | Drought               | -0.447                                       | 0.6494                    |
| All               | CV monthly growing season precipitation         | eGEI             | Drought               | 1.932                                        | 0.0534                    |
| All               | Mean growing season VPD                         | eGEI             | Drought               | -0.112                                       | 0.9238                    |
| All               | Inter-annual CV of growing season precipitation | eGEI             | Drought               | 1.275                                        | 0.1972                    |
| All               | Isothermality                                   | eSR - eGEI       | Cold                  | 1.389                                        | 0.1666                    |
| All               | SD monthly temperature                          | eSR - eGEI       | Cold                  | -2.580                                       | <b>0.0064</b>             |
| All               | Minimum temperature of coldest month            | eSR - eGEI       | Cold                  | -0.901                                       | 0.3702                    |
| All               | Temperature annual range                        | eSR - eGEI       | Cold                  | -1.786                                       | 0.0750                    |
| All               | Mean growing season temperature                 | eSR - eGEI       | Cold                  | -1.218                                       | 0.2200                    |
| All               | Mean monthly minimum growing season temperature | eSR - eGEI       | Cold                  | -0.071                                       | 0.9300                    |
| All               | CV monthly precipitation                        | eSR - eGEI       | Drought               | -2.410                                       | <b>0.0166</b>             |
| All               | Mean monthly growing season precipitation       | eSR - eGEI       | Drought               | -0.137                                       | 0.8940                    |
| All               | CV monthly growing season precipitation         | eSR - eGEI       | Drought               | -2.042                                       | <b>0.0406</b>             |
| All               | Mean growing season VPD                         | eSR - eGEI       | Drought               | 0.091                                        | 0.9428                    |
| All               | Inter-annual CV of growing season precipitation | eSR - eGEI       | Drought               | -1.271                                       | 0.1982                    |
| Early-flowering   | Isothermality                                   | eSR              | Cold                  | -2.362                                       | <b>0.0168</b>             |
| Early-flowering   | SD monthly temperature                          | eSR              | Cold                  | -2.311                                       | <b>0.0198</b>             |

|                 |                                                 |            |         |        |               |
|-----------------|-------------------------------------------------|------------|---------|--------|---------------|
| Early-flowering | Minimum temperature of coldest month            | eSR        | Cold    | -2.661 | <b>0.0080</b> |
| Early-flowering | Temperature annual range                        | eSR        | Cold    | -1.884 | 0.0622        |
| Early-flowering | Mean growing season temperature                 | eSR        | Cold    | -3.176 | <b>0.0010</b> |
| Early-flowering | Mean monthly minimum growing season temperature | eSR        | Cold    | -3.317 | <b>0.0012</b> |
| Early-flowering | CV monthly precipitation                        | eSR        | Drought | -1.115 | 0.2654        |
| Early-flowering | Mean monthly growing season precipitation       | eSR        | Drought | -1.120 | 0.2664        |
| Early-flowering | CV monthly growing season precipitation         | eSR        | Drought | -1.807 | 0.0760        |
| Early-flowering | Mean growing season VPD                         | eSR        | Drought | -0.289 | 0.7792        |
| Early-flowering | Inter-annual CV of growing season precipitation | eSR        | Drought | -1.760 | 0.0738        |
| Early-flowering | Isothermality                                   | eGEI       | Cold    | 2.123  | <b>0.0336</b> |
| Early-flowering | SD monthly temperature                          | eGEI       | Cold    | 1.499  | 0.1296        |
| Early-flowering | Minimum temperature of coldest month            | eGEI       | Cold    | 1.629  | 0.1034        |
| Early-flowering | Temperature annual range                        | eGEI       | Cold    | 1.878  | 0.0630        |
| Early-flowering | Mean growing season temperature                 | eGEI       | Cold    | 1.890  | 0.0602        |
| Early-flowering | Mean monthly minimum growing season temperature | eGEI       | Cold    | 2.320  | <b>0.0192</b> |
| Early-flowering | CV monthly precipitation                        | eGEI       | Drought | 1.757  | 0.0756        |
| Early-flowering | Mean monthly growing season precipitation       | eGEI       | Drought | -0.639 | 0.5254        |
| Early-flowering | CV monthly growing season precipitation         | eGEI       | Drought | 2.597  | <b>0.0146</b> |
| Early-flowering | Mean growing season VPD                         | eGEI       | Drought | 0.371  | 0.7124        |
| Early-flowering | Inter-annual CV of growing season precipitation | eGEI       | Drought | 2.283  | <b>0.0208</b> |
| Early-flowering | Isothermality                                   | eSR - eGEI | Cold    | -2.612 | <b>0.0074</b> |
| Early-flowering | SD monthly temperature                          | eSR - eGEI | Cold    | -1.972 | <b>0.0482</b> |
| Early-flowering | Minimum temperature of coldest month            | eSR - eGEI | Cold    | -2.186 | <b>0.0282</b> |
| Early-flowering | Temperature annual range                        | eSR - eGEI | Cold    | -2.257 | <b>0.0264</b> |
| Early-flowering | Mean growing season temperature                 | eSR - eGEI | Cold    | -2.546 | <b>0.0080</b> |
| Early-flowering | Mean monthly minimum growing season temperature | eSR - eGEI | Cold    | -3.024 | <b>0.0022</b> |
| Early-flowering | CV monthly precipitation                        | eSR - eGEI | Drought | -2.020 | <b>0.0438</b> |
| Early-flowering | Mean monthly growing season precipitation       | eSR - eGEI | Drought | 0.287  | 0.7792        |
| Early-flowering | CV monthly growing season precipitation         | eSR - eGEI | Drought | -3.062 | <b>0.0024</b> |
| Early-flowering | Mean growing season VPD                         | eSR - eGEI | Drought | -0.443 | 0.6520        |
| Early-flowering | Inter-annual CV of growing season precipitation | eSR - eGEI | Drought | -2.721 | <b>0.0072</b> |
| Late-flowering  | Isothermality                                   | eSR        | Cold    | 0.563  | 0.5738        |
| Late-flowering  | SD monthly temperature                          | eSR        | Cold    | -0.192 | 0.8664        |
| Late-flowering  | Minimum temperature of coldest month            | eSR        | Cold    | 1.362  | 0.1750        |
| Late-flowering  | Temperature annual range                        | eSR        | Cold    | -0.463 | 0.6390        |
| Late-flowering  | Mean growing season temperature                 | eSR        | Cold    | -2.437 | <b>0.0138</b> |
| Late-flowering  | Mean monthly minimum growing season temperature | eSR        | Cold    | -0.692 | 0.5016        |
| Late-flowering  | CV monthly precipitation                        | eSR        | Drought | 0.575  | 0.5682        |
| Late-flowering  | Mean monthly growing season precipitation       | eSR        | Drought | -1.838 | 0.0668        |
| Late-flowering  | CV monthly growing season precipitation         | eSR        | Drought | 0.043  | 0.9560        |
| Late-flowering  | Mean growing season VPD                         | eSR        | Drought | 0.506  | 0.6264        |
| Late-flowering  | Inter-annual CV of growing season precipitation | eSR        | Drought | -1.466 | 0.1500        |
| Late-flowering  | Isothermality                                   | eGEI       | Cold    | 0.865  | 0.3902        |
| Late-flowering  | SD monthly temperature                          | eGEI       | Cold    | 1.692  | 0.1002        |
| Late-flowering  | Minimum temperature of coldest month            | eGEI       | Cold    | 1.501  | 0.1444        |
| Late-flowering  | Temperature annual range                        | eGEI       | Cold    | 0.080  | 0.9276        |

|                |                                                 |               |         |        |               |
|----------------|-------------------------------------------------|---------------|---------|--------|---------------|
| Late-flowering | Mean growing season temperature                 | eGEI          | Cold    | -0.675 | 0.5098        |
| Late-flowering | Mean monthly minimum growing season temperature | eGEI          | Cold    | -1.024 | 0.3058        |
| Late-flowering | CV monthly precipitation                        | eGEI          | Drought | 2.328  | <b>0.0182</b> |
| Late-flowering | Mean monthly growing season precipitation       | eGEI          | Drought | 1.345  | 0.1792        |
| Late-flowering | CV monthly growing season precipitation         | eGEI          | Drought | 1.629  | 0.1070        |
| Late-flowering | Mean growing season VPD                         | eGEI          | Drought | 1.750  | 0.0800        |
| Late-flowering | Inter-annual CV of growing season precipitation | eGEI          | Drought | 0.638  | 0.5278        |
| Late-flowering | Isothermality                                   | eSR -<br>eGEI | Cold    | -0.693 | 0.4934        |
| Late-flowering | SD monthly temperature                          | eSR -<br>eGEI | Cold    | -1.762 | 0.0822        |
| Late-flowering | Minimum temperature of coldest month            | eSR -<br>eGEI | Cold    | -1.085 | 0.2754        |
| Late-flowering | Temperature annual range                        | eSR -<br>eGEI | Cold    | -0.225 | 0.8264        |
| Late-flowering | Mean growing season temperature                 | eSR -<br>eGEI | Cold    | -0.086 | 0.9318        |
| Late-flowering | Mean monthly minimum growing season temperature | eSR -<br>eGEI | Cold    | 0.826  | 0.4122        |
| Late-flowering | CV monthly precipitation                        | eSR -<br>eGEI | Drought | -2.161 | <b>0.0304</b> |
| Late-flowering | Mean monthly growing season precipitation       | eSR -<br>eGEI | Drought | -1.777 | 0.0796        |
| Late-flowering | CV monthly growing season precipitation         | eSR -<br>eGEI | Drought | -1.599 | 0.1118        |
| Late-flowering | Mean growing season VPD                         | eSR -<br>eGEI | Drought | -1.583 | 0.1110        |
| Late-flowering | Inter-annual CV of growing season precipitation | eSR -<br>eGEI | Drought | -0.971 | 0.3320        |

363

364

365

366 **Table S3.** Results for enrichment tests with fitness associations. Enrichments  
367 (frequency of genes in list having SNPs in the 5<sup>th</sup> percentile for *p*-values) are  
368 calculated as a *z*-score using the distribution from null permutations. Gene lists  
369 with significant enrichment of fitness variables are shown in bold. Tests were not  
370 stratified by flowering time because of limited sample size in fitness experiments.

| <i>Fitness component</i> | <i>Location</i> | <i>Abiotic stress</i> | <i>Gene list</i> | <i>Frequency of significant SNPs z-score</i> | <i>Permutation test p</i> |
|--------------------------|-----------------|-----------------------|------------------|----------------------------------------------|---------------------------|
| Survival                 | Finland         | eGEI                  | cold             | 0.20                                         | 0.8270                    |
| Survival                 | Finland         | eGEI                  | drought          | 0.83                                         | 0.4052                    |
| Survival                 | Germany         | eGEI                  | cold             | -0.56                                        | 0.5888                    |
| Survival                 | Germany         | eGEI                  | drought          | 0.50                                         | 0.6102                    |
| Survival                 | Spain           | eGEI                  | cold             | 1.07                                         | 0.2880                    |
| Survival                 | Spain           | eGEI                  | drought          | 0.95                                         | 0.3414                    |
| Survival                 | UK              | eGEI                  | cold             | -1.36                                        | 0.1712                    |
| Survival                 | UK              | eGEI                  | drought          | -1.03                                        | 0.3028                    |
| Survival                 | Finland         | eSR                   | cold             | -1.49                                        | 0.1382                    |
| Survival                 | Finland         | eSR                   | drought          | 0.03                                         | 0.9692                    |
| Survival                 | Germany         | eSR                   | cold             | -1.40                                        | 0.1604                    |
| Survival                 | Germany         | eSR                   | drought          | -0.06                                        | 0.9422                    |
| Survival                 | Spain           | eSR                   | cold             | -3.67                                        | <b>0.0008</b>             |
| Survival                 | Spain           | eSR                   | drought          | -1.60                                        | 0.1066                    |
| Survival                 | UK              | eSR                   | cold             | -2.92                                        | <b>0.0046</b>             |
| Survival                 | UK              | eSR                   | drought          | -2.08                                        | <b>0.0360</b>             |
| Survival                 | Finland         | eSR - eGEI            | cold             | -0.70                                        | 0.4754                    |
| Survival                 | Finland         | eSR - eGEI            | drought          | -0.80                                        | 0.4112                    |
| Survival                 | Germany         | eSR - eGEI            | cold             | 0.08                                         | 0.9326                    |
| Survival                 | Germany         | eSR - eGEI            | drought          | -0.50                                        | 0.6026                    |
| Survival                 | Spain           | eSR - eGEI            | cold             | -2.36                                        | <b>0.0202</b>             |
| Survival                 | Spain           | eSR - eGEI            | drought          | -1.39                                        | 0.1638                    |
| Survival                 | UK              | eSR - eGEI            | cold             | 0.36                                         | 0.7152                    |
| Survival                 | UK              | eSR - eGEI            | drought          | 0.41                                         | 0.6794                    |
| Silique N                | Finland         | eGEI                  | cold             | 0.49                                         | 0.6178                    |
| Silique N                | Finland         | eGEI                  | drought          | 0.60                                         | 0.5478                    |
| Silique N                | Germany         | eGEI                  | cold             | 1.05                                         | 0.2924                    |
| Silique N                | Germany         | eGEI                  | drought          | -0.16                                        | 0.8698                    |
| Silique N                | Spain           | eGEI                  | cold             | 0.50                                         | 0.6226                    |
| Silique N                | Spain           | eGEI                  | drought          | -0.80                                        | 0.4258                    |
| Silique N                | UK              | eGEI                  | cold             | 0.09                                         | 0.9384                    |

|     |           |         |            |         |       |               |
|-----|-----------|---------|------------|---------|-------|---------------|
|     | Silique N | UK      | eGEI       | drought | -1.51 | 0.1282        |
|     | Silique N | Finland | eSR        | cold    | -2.19 | <b>0.0338</b> |
|     | Silique N | Finland | eSR        | drought | -0.76 | 0.4478        |
|     | Silique N | Germany | eSR        | cold    | -0.12 | 0.9052        |
|     | Silique N | Germany | eSR        | drought | -0.36 | 0.7028        |
|     | Silique N | Spain   | eSR        | cold    | -1.13 | 0.2590        |
|     | Silique N | Spain   | eSR        | drought | -0.74 | 0.4630        |
|     | Silique N | UK      | eSR        | cold    | -1.42 | 0.1556        |
|     | Silique N | UK      | eSR        | drought | -1.11 | 0.2626        |
|     | Silique N | Finland | eSR - eGEI | cold    | -1.24 | 0.2232        |
|     | Silique N | Finland | eSR - eGEI | drought | -0.79 | 0.4336        |
|     | Silique N | Germany | eSR - eGEI | cold    | -1.09 | 0.2784        |
|     | Silique N | Germany | eSR - eGEI | drought | 0.06  | 0.9570        |
|     | Silique N | Spain   | eSR - eGEI | cold    | -0.87 | 0.3738        |
|     | Silique N | Spain   | eSR - eGEI | drought | 0.58  | 0.5632        |
|     | Silique N | UK      | eSR - eGEI | cold    | -0.57 | 0.5708        |
|     | Silique N | UK      | eSR - eGEI | drought | 1.15  | 0.2506        |
| 371 |           |         |            |         |       |               |
| 372 |           |         |            |         |       |               |
| 373 |           |         |            |         |       |               |
| 374 |           |         |            |         |       |               |
| 375 |           |         |            |         |       |               |

376 **Table S4.** Results for enrichment tests with selection statistics based on  
 377 resequencing of 80 accessions. The mean statistic for genes in each gene list,  
 378 standardized to the null permutations, is shown as “Mean (z-score).” Gene lists  
 379 with significant enrichment of selection statistics are shown in bold. Tests were  
 380 conducted without stratifying by flowering time because resequencing data were  
 381 from too few accessions.

382

| <i>Statistic</i>  | <i>Gene list</i> | <i>Abiotic stress</i> | <i>Mean<br/>(enrichment z-<br/>score)</i> | <i>Permutation<br/>test p</i> |
|-------------------|------------------|-----------------------|-------------------------------------------|-------------------------------|
| $K_a/K_s$         | eSR              | Drought               | -15.76                                    | <b>&lt;0.0002</b>             |
|                   | eSR              | Cold                  | -16.35                                    | <b>&lt;0.0002</b>             |
|                   | eGEI             | Drought               | -0.74                                     | 0.4651                        |
|                   | eGEI             | Cold                  | -4.76                                     | <b>&lt;0.0002</b>             |
|                   | eSR - eGEI       | Drought               | -3.93                                     | <b>0.0004</b>                 |
|                   | eSR - eGEI       | Cold                  | -1.03                                     | 0.3013                        |
| Promoter $\theta$ | eSR              | Drought               | -3.560                                    | <b>0.0066</b>                 |
|                   | eSR              | Cold                  | -3.300                                    | <b>0.0329</b>                 |
|                   | eGEI             | Drought               | 2.190                                     | <b>0.0248</b>                 |
|                   | eGEI             | Cold                  | 1.580                                     | 0.1181                        |
|                   | eSR - eGEI       | Drought               | -3.580                                    | <b>0.0042</b>                 |
|                   | eSR - eGEI       | Cold                  | -3.320                                    | <b>0.0043</b>                 |

383

384

385 **Table S5. [attached .xls file]** Table of accessions included in the various data sets  
386 analyzed in this study.

387 **Table S6.** Enrichment of gene lists for mean rank of motif counts (O'Brien 1984).

388 The mean statistic for genes in each gene list, standardized to the null

389 permutations, is shown as a z-score. For example, a z-score > 0 indicates the

390 motif is more common in the gene list compared to random genes. Gene lists with

391 a significant motif frequency are shown in bold. DRE/CBFs are read both forward

392 and reverse (2d) or only one direction at a time (1d).

393

| <i>Motif</i>  | <i>Treatment</i> | <i>Mean eSR</i><br><i>Z</i> | <i>Mean eSR</i><br><i>p</i> | <i>Mean eGEI</i><br><i>Z</i> | <i>Mean eGEI p</i> | <i>Mean eSR -</i><br><i>Mean eGEI</i><br><i>Z</i> | <i>Mean eSR -</i><br><i>Mean eGEI p</i> |
|---------------|------------------|-----------------------------|-----------------------------|------------------------------|--------------------|---------------------------------------------------|-----------------------------------------|
| ABRE          | drought          | 5.86                        | <b>&lt;0.0002</b>           | 0.48                         | 0.6314             | 1.36                                              | 0.1754                                  |
| ABRE          | cold             | 1.91                        | 0.0570                      | 12.55                        | <b>&lt;0.0002</b>  | -2.89                                             | <b>0.0044</b>                           |
| DRE/CBF<br>2d | drought          | 2.87                        | <b>0.0038</b>               | -1.69                        | 0.0812             | 2.50                                              | <b>0.0124</b>                           |
| DRE/CBF<br>2d | cold             | 1.10                        | 0.2682                      | 3.00                         | <b>0.0010</b>      | -0.05                                             | 0.9722                                  |
| DRE/CBF<br>1d | drought          | 3.24                        | <b>0.0012</b>               | -0.81                        | 0.4278             | 1.75                                              | 0.0748                                  |
| DRE/CBF<br>1d | cold             | 1.28                        | 0.2108                      | 1.24                         | 0.2118             | 0.77                                              | 0.4370                                  |

394

395

396

397

**Table S7.** The enrichment of specific motifs in the promoters of genes with transcriptional plasticity. The mean statistic for genes in each gene list, standardized to the null permutations, is shown as a z-score. For example, a z-score > 0 indicates the motif is more common in the gene list compared to random genes. Gene lists with a significant motif frequency are shown in bold. Core motifs are shown in bold. Gene lists with a significant motif frequency are shown in bold. DRE/CBFs are read both forward and reverse (2 directions) or only one direction at a time (F-forward or R-reverse).

| <i>Motif</i>                 | <i>Treatment</i> | <i>Mean eSR</i><br>Z | <i>Mean eSR</i><br>p | <i>Mean eGEI</i><br>Z | <i>Mean eGEI</i><br>p | <i>Mean eSR -</i><br><i>Mean eGEI</i><br>Z | <i>Mean eSR -</i><br><i>Mean eGEI</i><br>p |
|------------------------------|------------------|----------------------|----------------------|-----------------------|-----------------------|--------------------------------------------|--------------------------------------------|
| <b>ABREs</b>                 |                  |                      |                      |                       |                       |                                            |                                            |
| <b>ACGT</b>                  | drought          | 4.34                 | <b>0.0000</b>        | 0.42                  | 0.6826                | 0.94                                       | 0.3602                                     |
| <b>ACGT</b>                  | cold             | 1.43                 | 0.1516               | 9.53                  | <b>0.0000</b>         | -2.25                                      | <b>0.0236</b>                              |
| ACACGTGG                     | drought          | 4.40                 | <b>0.0000</b>        | 0.49                  | 0.5994                | 0.86                                       | 0.4034                                     |
| ACACGTGG                     | cold             | 1.20                 | 0.2278               | 1.99                  | <b>0.0496</b>         | 0.42                                       | 0.6768                                     |
| ACGTG                        | drought          | 6.09                 | <b>0.0000</b>        | 0.32                  | 0.7468                | 1.56                                       | 0.1224                                     |
| ACGTG                        | cold             | 2.21                 | <b>0.0318</b>        | 12.80                 | <b>0.0000</b>         | -2.68                                      | <b>0.0072</b>                              |
| ACGTGG                       | drought          | 4.80                 | <b>0.0000</b>        | -0.66                 | 0.5254                | 2.10                                       | <b>0.0300</b>                              |
| ACGTGG                       | cold             | 1.84                 | 0.0698               | 8.16                  | <b>0.0000</b>         | -1.32                                      | 0.1840                                     |
| ACGTGT                       | drought          | 4.42                 | <b>0.0000</b>        | 0.78                  | 0.4300                | 0.57                                       | 0.5628                                     |
| ACGTGT                       | cold             | 1.46                 | 0.1460               | 9.18                  | <b>0.0000</b>         | -1.93                                      | 0.0532                                     |
| CACGTG Gbox                  | drought          | 7.14                 | <b>0.0000</b>        | -0.10                 | 0.9252                | 2.28                                       | <b>0.0202</b>                              |
| CACGTG Gbox                  | cold             | 2.47                 | <b>0.0156</b>        | 10.70                 | <b>0.0000</b>         | -1.54                                      | 0.1176                                     |
| CACGTT TGbox                 | drought          | -0.43                | 0.6742               | -0.52                 | 0.6108                | 0.38                                       | 0.7146                                     |
| CACGTT TGbox                 | cold             | -1.16                | 0.2444               | 0.00                  | 0.9916                | -1.12                                      | 0.2648                                     |
| CCACGTGG                     | drought          | 3.53                 | <b>0.0006</b>        | 0.56                  | 0.5578                | 0.52                                       | 0.6110                                     |
| CCACGTGG                     | cold             | 1.09                 | 0.2826               | 8.89                  | <b>0.0000</b>         | -2.27                                      | <b>0.0184</b>                              |
| <b>DRE/CBFs 2 directions</b> |                  |                      |                      |                       |                       |                                            |                                            |
| <b>GCCGAC CAGCCG</b>         | drought          | 3.24                 | <b>0.0012</b>        | -1.88                 | 0.0596                | 2.80                                       | <b>0.0032</b>                              |
| <b>GCCGAC CAGCCG</b>         | cold             | 1.55                 | 0.1178               | 2.97                  | <b>0.0024</b>         | 0.40                                       | 0.6906                                     |
| AGCCGAC CAGCCGA              | drought          | 2.74                 | <b>0.0068</b>        | -0.80                 | 0.4338                | 1.61                                       | 0.0892                                     |
| AGCCGAC CAGCCGA              | cold             | 0.70                 | 0.4834               | 2.85                  | <b>0.0060</b>         | -0.36                                      | 0.7304                                     |
| GGCCGAC CAGCCGG              | drought          | -0.42                | 0.6836               | -1.04                 | 0.3010                | 0.89                                       | 0.3782                                     |
| GGCCGAC CAGCCGG              | cold             | 0.69                 | 0.4754               | -0.14                 | 0.8922                | 0.72                                       | 0.4624                                     |
| <b>DRE/CBFs 1 direction</b>  |                  |                      |                      |                       |                       |                                            |                                            |
| <b>GCCGAC F</b>              | drought          | 3.28                 | <b>0.0004</b>        | -1.89                 | 0.0526                | 2.82                                       | <b>0.0014</b>                              |
| <b>GCCGAC F</b>              | cold             | 1.54                 | 0.1252               | 2.96                  | <b>0.0028</b>         | 0.40                                       | 0.7006                                     |
| <b>CAGCCG R</b>              | drought          | 1.66                 | 0.0912               | 0.68                  | 0.4868                | -0.17                                      | 0.8594                                     |
| <b>CAGCCG R</b>              | cold             | 1.10                 | 0.2746               | -4.71                 | <b>0.0000</b>         | 2.79                                       | <b>0.0066</b>                              |

|     |           |         |       |               |       |               |       |               |
|-----|-----------|---------|-------|---------------|-------|---------------|-------|---------------|
|     | AGCCGAC F | drought | 2.75  | <b>0.0070</b> | -0.82 | 0.4248        | 1.61  | 0.0916        |
|     | AGCCGAC F | cold    | 0.69  | 0.4924        | 2.85  | <b>0.0056</b> | -0.38 | 0.7252        |
|     | CAGCCGA R | drought | 1.75  | 0.0780        | -1.61 | 0.0926        | 2.09  | <b>0.0262</b> |
|     | CAGCCGA R | cold    | 0.48  | 0.6102        | 2.51  | <b>0.0130</b> | -0.45 | 0.6608        |
|     | CAGCCGG R | drought | 0.62  | 0.5320        | 1.76  | 0.0908        | -1.53 | 0.1330        |
|     | CAGCCGG R | cold    | 0.20  | 0.8102        | -1.41 | 0.1578        | 0.71  | 0.4726        |
|     | GGCCGAC F | drought | -0.42 | 0.6708        | -1.04 | 0.3016        | 0.89  | 0.3832        |
|     | GGCCGAC F | cold    | 0.71  | 0.4680        | -0.15 | 0.8916        | 0.73  | 0.4492        |
| 406 |           |         |       |               |       |               |       |               |
| 407 |           |         |       |               |       |               |       |               |
| 408 |           |         |       |               |       |               |       |               |
| 409 |           |         |       |               |       |               |       |               |
| 410 |           |         |       |               |       |               |       |               |

**Table S8.** Enrichment of gene lists for mean rank of variance in motif frequency among accessions. The mean statistic for genes in each gene list, standardized to the null permutations, is shown as a z-score. For example, a z-score  $> 0$  indicates that genes having the motif have higher variance in motif frequency among accessions than expected. Gene lists with a significant motif frequency are shown in bold. Gene lists with a significant motif frequency are shown in bold. DRE/CBFs are read both forward and reverse (2d) or only one direction at a time (1d).

419

420

421

| <i>Motif</i> | <i>Treatment</i> | <i>Var. eSR Z</i> | <i>Var. eSR p</i> | <i>Var. eGEI Z</i> | <i>Var. eGEI p</i> | <i>Var. eSR - Var. eGEI Z</i> | <i>Var. eSR - Var. eGEI p</i> |
|--------------|------------------|-------------------|-------------------|--------------------|--------------------|-------------------------------|-------------------------------|
| ABRE         | drought          | -7.08             | <b>&lt;0.0002</b> | 2.16               | <b>0.0336</b>      | -4.48                         | <b>&lt;0.0002</b>             |
| ABRE         | cold             | -3.38             | <b>0.0006</b>     | -0.64              | 0.5048             | -2.93                         | <b>0.0040</b>                 |
| DRE/CBF 2d   | drought          | -1.13             | 0.2602            | -1.42              | 0.1604             | 1.05                          | 0.2920                        |
| DRE/CBF 2d   | cold             | -1.02             | 0.3154            | -2.21              | <b>0.0270</b>      | -0.18                         | 0.8542                        |
| DRE/CBF 1d   | drought          | -1.22             | 0.2192            | -1.63              | 0.1008             | 1.22                          | 0.2228                        |
| DRE/CBF 1d   | cold             | -1.21             | 0.2352            | -0.61              | 0.5260             | -0.94                         | 0.3414                        |

422

423

424

425

426 **Table S9.** Variance among accessions in the count of motifs. The mean statistic  
427 for genes in each gene list, standardized to the null permutations, is shown as a z-  
428 score. For example, a z-score  $> 0$  indicates that genes having the motif have  
429 higher variance in motif frequency among accessions than expected. Gene lists  
430 with a significant motif frequency are shown in bold. Core motifs are shown in  
431 bold. Gene lists with a significant motif frequency are shown in bold. DRE/CBFs  
432 are read both forward and reverse (2 directions) or only one direction at a time (F-  
433 forward or R-reverse).  
434

| <i>Motif</i>                 | <i>Treatment</i> | <i>Var. eSR</i><br><i>Z</i> | <i>Var. eSR</i><br><i>p</i> | <i>Var. eGEI</i><br><i>Z</i> | <i>Var.</i><br><i>eGEI p</i> | <i>Var. eSR -</i><br><i>Var. eGEI</i><br><i>Z</i> | <i>Var. eSR -</i><br><i>Var. eGEI</i><br><i>p</i> |
|------------------------------|------------------|-----------------------------|-----------------------------|------------------------------|------------------------------|---------------------------------------------------|---------------------------------------------------|
| <b>ABREs</b>                 |                  |                             |                             |                              |                              |                                                   |                                                   |
| <b>ACGT</b>                  | drought          | -5.11                       | <b>0.0000</b>               | 1.38                         | 0.1800                       | -2.94                                             | <b>0.0060</b>                                     |
| <b>ACGT</b>                  | cold             | -2.23                       | <b>0.0164</b>               | 3.18                         | <b>0.0012</b>                | -3.39                                             | <b>0.0002</b>                                     |
| ACACGTGG                     | drought          | -0.85                       | 0.3996                      | 2.25                         | <b>0.0294</b>                | -2.43                                             | <b>0.0194</b>                                     |
| ACACGTGG                     | cold             | -0.53                       | 0.6140                      | -2.96                        | <b>0.0034</b>                | 0.55                                              | 0.5662                                            |
| ACGTG                        | drought          | -5.62                       | <b>0.0000</b>               | -0.02                        | 0.9886                       | -1.73                                             | 0.0974                                            |
| ACGTG                        | cold             | -2.14                       | <b>0.0240</b>               | 0.38                         | 0.7190                       | -2.19                                             | <b>0.0242</b>                                     |
| ACGTGG                       | drought          | -2.17                       | <b>0.0258</b>               | -0.11                        | 0.9406                       | -0.56                                             | 0.5646                                            |
| ACGTGG                       | cold             | -1.52                       | 0.1082                      | -2.37                        | <b>0.0126</b>                | -0.57                                             | 0.5882                                            |
| ACGTGT                       | drought          | -5.27                       | <b>0.0000</b>               | 0.33                         | 0.7224                       | -1.89                                             | 0.0646                                            |
| ACGTGT                       | cold             | -1.84                       | 0.0552                      | 0.87                         | 0.3668                       | -2.10                                             | <b>0.0292</b>                                     |
| CACGTG Gbox                  | drought          | -2.92                       | <b>0.0032</b>               | -0.24                        | 0.8180                       | -0.63                                             | 0.5030                                            |
| CACGTG Gbox                  | cold             | -0.90                       | 0.3624                      | -2.61                        | <b>0.0056</b>                | 0.10                                              | 0.8848                                            |
| CACGTT TGbox                 | drought          | -3.16                       | <b>0.0010</b>               | 3.43                         | <b>0.0072</b>                | -4.29                                             | <b>0.0014</b>                                     |
| CACGTT TGbox                 | cold             | -1.21                       | 0.1942                      | -0.63                        | 0.5492                       | -0.93                                             | 0.3494                                            |
| CCACGTGG                     | drought          | -0.16                       | 0.8782                      | -0.55                        | 0.6134                       | 0.49                                              | 0.6476                                            |
| CCACGTGG                     | cold             | -0.62                       | 0.5436                      | -2.64                        | <b>0.0062</b>                | 0.35                                              | 0.7016                                            |
| <b>DRE/CBFs 2 directions</b> |                  |                             |                             |                              |                              |                                                   |                                                   |
| <b>GCCGAC CAGCCG</b>         | drought          | -0.70                       | 0.4802                      | -1.90                        | 0.0532                       | 1.64                                              | 0.0972                                            |
| <b>GCCGAC CAGCCG</b>         | cold             | -0.81                       | 0.4248                      | -1.66                        | 0.0992                       | -0.17                                             | 0.8694                                            |
| AGCCGAC CAGCCGA              | drought          | -0.45                       | 0.6556                      | -1.32                        | 0.1548                       | 1.17                                              | 0.2280                                            |
| AGCCGAC CAGCCGA              | cold             | -0.26                       | 0.8270                      | -2.42                        | <b>0.0120</b>                | 0.62                                              | 0.5240                                            |
| GGCCGAC CAGCCGG              | drought          | -0.11                       | 0.9070                      | -0.44                        | 0.6736                       | 0.40                                              | 0.7152                                            |
| GGCCGAC CAGCCGG              | cold             | -0.47                       | 0.6544                      | 0.34                         | 0.7248                       | -0.57                                             | 0.5762                                            |
| <b>DRE/CBFs 1 direction</b>  |                  |                             |                             |                              |                              |                                                   |                                                   |
| <b>GCCGAC F</b>              | drought          | -0.69                       | 0.4912                      | -1.92                        | <b>0.0448</b>                | 1.66                                              | 0.0888                                            |
| <b>GCCGAC F</b>              | cold             | -0.83                       | 0.4154                      | -1.66                        | 0.0944                       | -0.18                                             | 0.8630                                            |

|                 |         |       |        |       |               |       |               |
|-----------------|---------|-------|--------|-------|---------------|-------|---------------|
| <b>CAGCCG R</b> | drought | -1.64 | 0.0972 | -1.63 | 0.0770        | 1.08  | 0.2600        |
| <b>CAGCCG R</b> | cold    | -0.74 | 0.4748 | 0.06  | 0.9544        | -0.74 | 0.4644        |
| AGCCGAC F       | drought | -0.43 | 0.6600 | -1.33 | 0.1566        | 1.18  | 0.2296        |
| AGCCGAC F       | cold    | -0.27 | 0.8110 | -2.42 | <b>0.0144</b> | 0.62  | 0.5222        |
| CAGCCGA R       | drought | -1.81 | 0.0706 | -2.94 | <b>0.0010</b> | 2.35  | <b>0.0094</b> |
| CAGCCGA R       | cold    | -0.26 | 0.8228 | -0.96 | 0.3280        | 0.09  | 0.9092        |
| CAGCCGG R       | drought | -1.19 | 0.2412 | -0.79 | 0.4114        | 0.44  | 0.7154        |
| CAGCCGG R       | cold    | -0.33 | 0.8080 | 0.57  | 0.5834        | -0.52 | 0.6370        |
| GGCCGAC F       | drought | -0.12 | 0.9064 | -0.45 | 0.6656        | 0.41  | 0.7034        |
| GGCCGAC F       | cold    | -0.47 | 0.6624 | 0.33  | 0.7292        | -0.57 | 0.5808        |

435

436

437

438

439

440 **Table S10.** Flowering time experiments used to fit a SNP-based model of

441 flowering time category.

442

| Reference                     | Photoperiod<br>(hrs) | Natural light conditions | Temp. (°C) | N accessions | Notes                                         |
|-------------------------------|----------------------|--------------------------|------------|--------------|-----------------------------------------------|
| Zhao et al. 2007              | 16                   | n/a                      | 18         | 167          |                                               |
| Zhao et al. 2007              | 8                    | n/a                      | 18         | 162          |                                               |
| Atwell et al. 2010            | 16                   | n/a                      | 10         | 194          |                                               |
| Atwell et al. 2010            | 16                   | n/a                      | 16         | 193          |                                               |
| Atwell et al. 2010            | 16                   | n/a                      | 22         | 193          |                                               |
| Zhao et al. 2007              | 16                   | n/a                      | 23         | 137          |                                               |
| Shindo et al. 2005            | n/a                  | 52°37' N, Oct. – March   | 20-22      | 153          |                                               |
| Atwell et al. 2010            | 16                   | n/a                      | 20         | 166          |                                               |
| Li et al. 2010                | n/a                  | 41°43' N, March.-July    | 5-27       | 445          | simulated natural day length and temperature  |
| Li et al. 2010                | n/a                  | 55°43' N, May – Sep.     | 5-21       | 445          | simulated natural day length and temperature  |
| Li et al. 2010                | n/a                  | 41°43' N, Apr. – Sep.    | 7-28       | 445          | simulated natural day length and temperature  |
| Li et al. 2010                | n/a                  | 55°43' N, June – Nov.    | 5-21       | 445          | simulated natural day length and temperature  |
| Kenney et al. <i>In prep.</i> | 16                   | n/a                      | 18-22      | 205          | drought stress applied to half of individuals |

443

444

445

446 **Figure S1.** Coding regions of eSR (blue) and eGEI (red) genes from a cold-  
447 acclimation experiment (Hannah et al. 2006) mapped across the genome. Genes  
448 that are both eSR and eGEI are shown in purple. A small border is added to each  
449 gene to improve visibility.

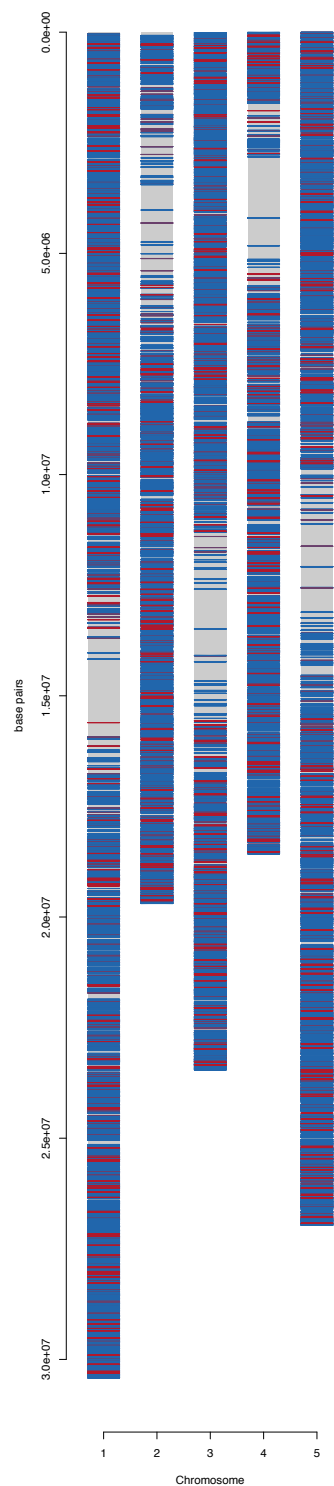

451 **Figure S2.** Coding regions of eSR (blue) and eGEI (red) genes from a drought  
452 experiment (Des Marais et al. 2012) mapped across the genome. Genes that are  
453 both eSR and eGEI are shown in purple. A small border is added to each gene to  
454 improve visibility.

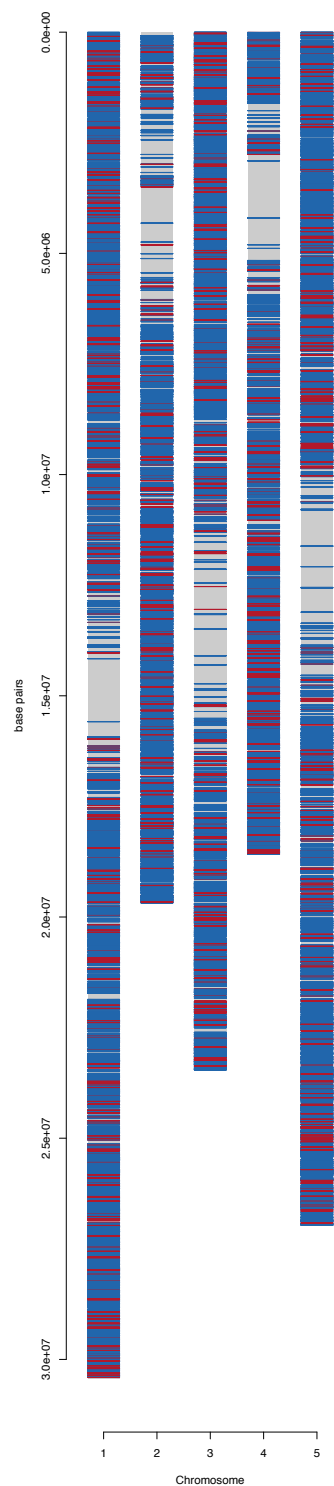

456 **Figure S3.** Schematic of permutation tests for enrichment. Representation of  
457 permutation tests for enrichment of eSR and eGEI gene sets with SNP  
458 associations to climate, fitness, or selection statistics. 1. GWAS statistics for  
459 SNPs (red) within a window where a moving average of correlation  $r$  among SNP  
460 state is  $> 3$  are identified. 2. The observed enrichment test statistic is calculated as  
461 the proportion of genes in that set (step 1) that have a SNP with a climate, fitness,  
462 or selection statistic in the 0.05 tail of lowest  $p$ -values. 3. This proportion is then  
463 compared to a null distribution generated from randomly permuted gene sets with  
464 the same number of genes as the observed set.

## 1. GWAS

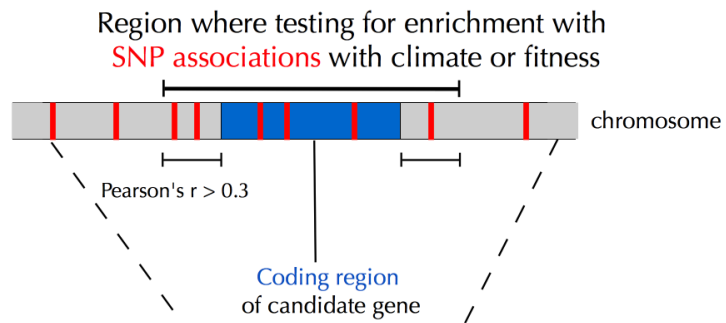

## 2. Enrichment

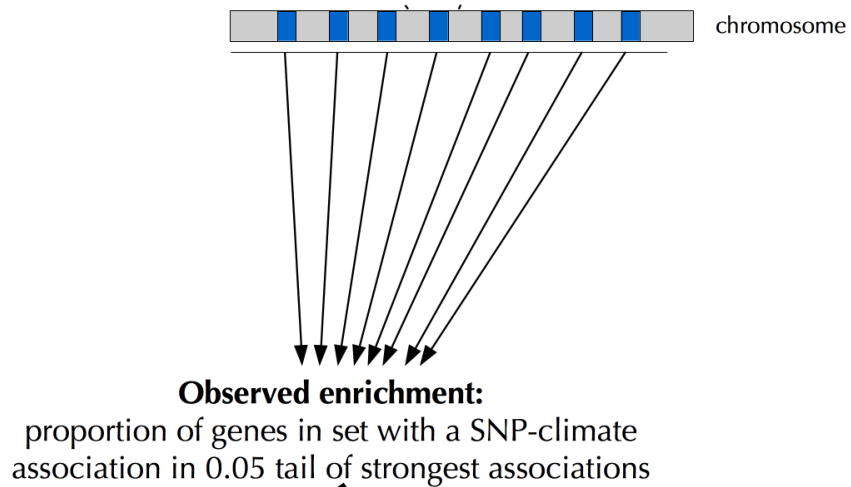

## 3. Permutation

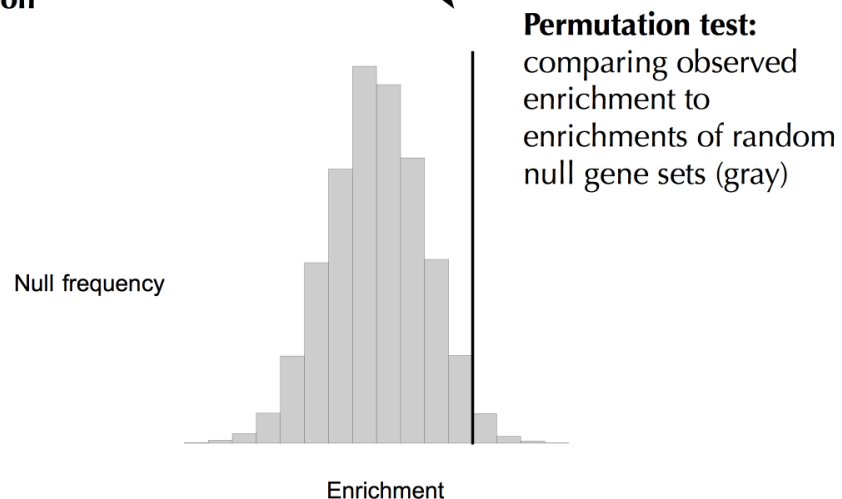

466 **Figure S4.** Reaction norm of flowering time across 13 published experiments  
 467 (Table S10). Lines connect accessions and open circles represent accessions not  
 468 present in the adjoining experiments in the figure. Green accessions are those  
 469 classified as late-flowering and blue are early-flowering. Closed black circles  
 470 represent cluster means used to define early versus late-flowering groups in k-  
 471 means clustering conducted on accessions present in all experiments.  
 472

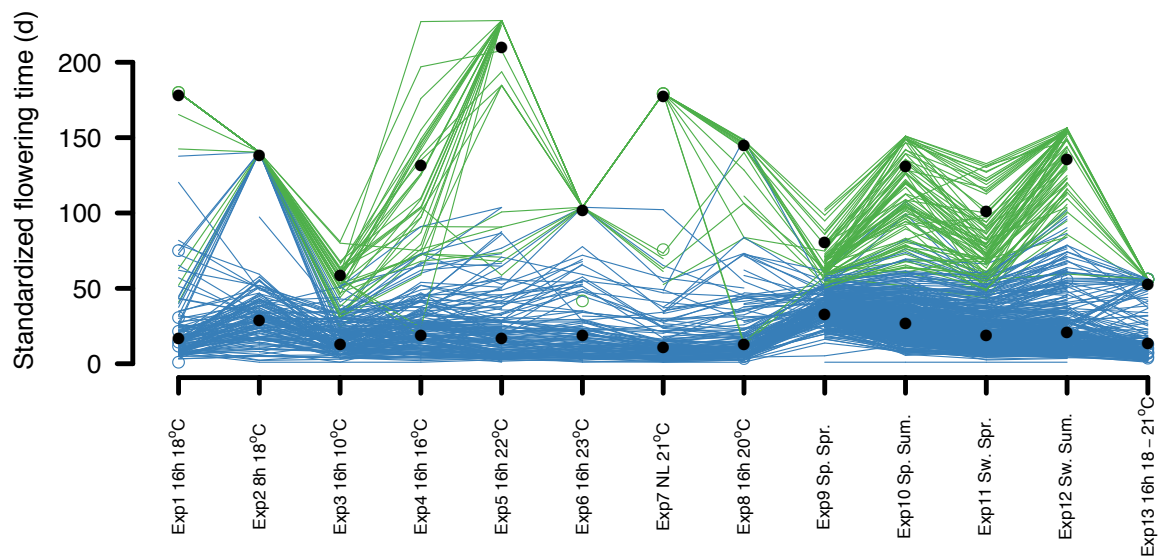

473  
 474

475 **Figure S5.** The enrichment of candidate gene sets with associations to fitness  
476 variables. Observed enrichments are calculated as a z-score using the distribution  
477 from null permutations. Enrichment of eSR genes is shown in blue, while eGEI  
478 genes are shown in red. Null permutations are shown as small gray dots (<sup>0</sup>p <  
479 0.1, '\*' p < 0.05, '\*\*' p < 0.01, '\*\*\*' p < 0.005).  
480

eSR genes

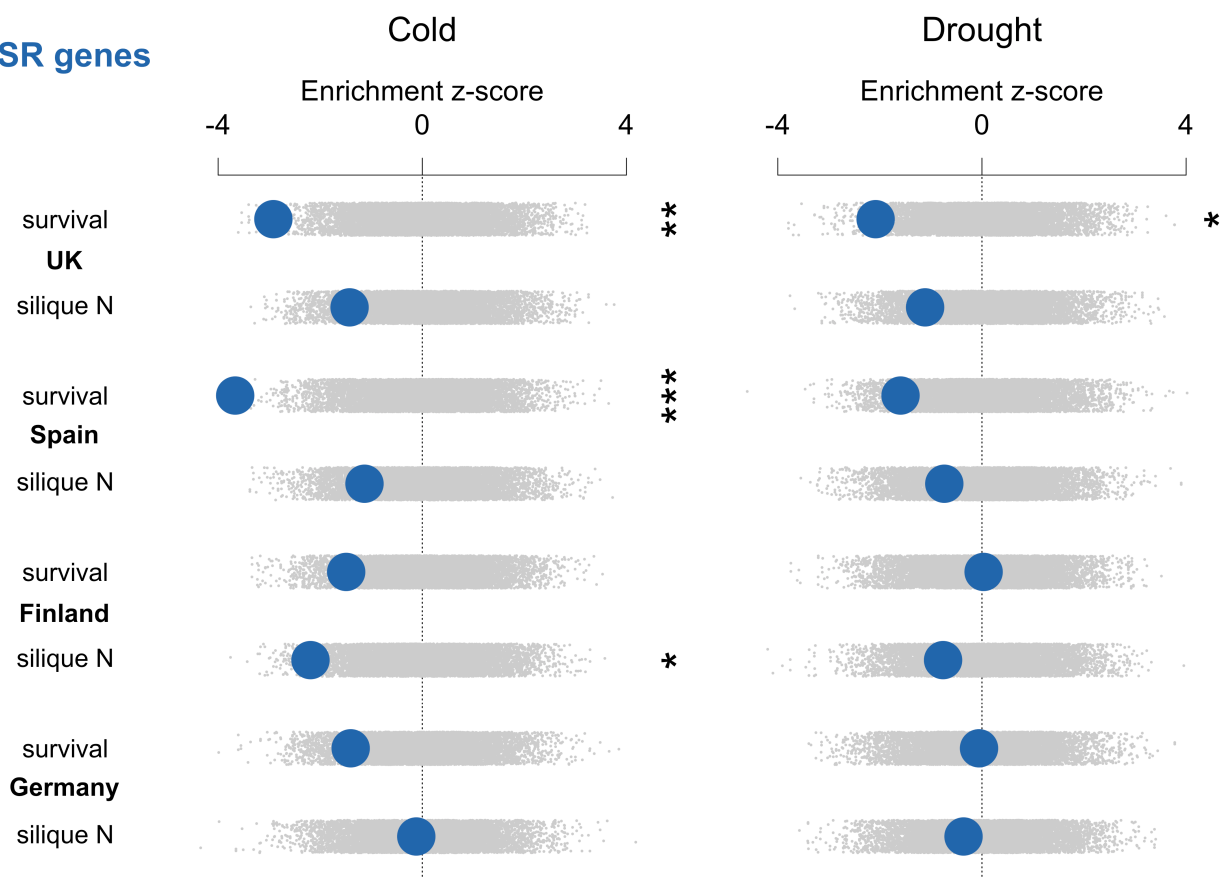

eGEI genes

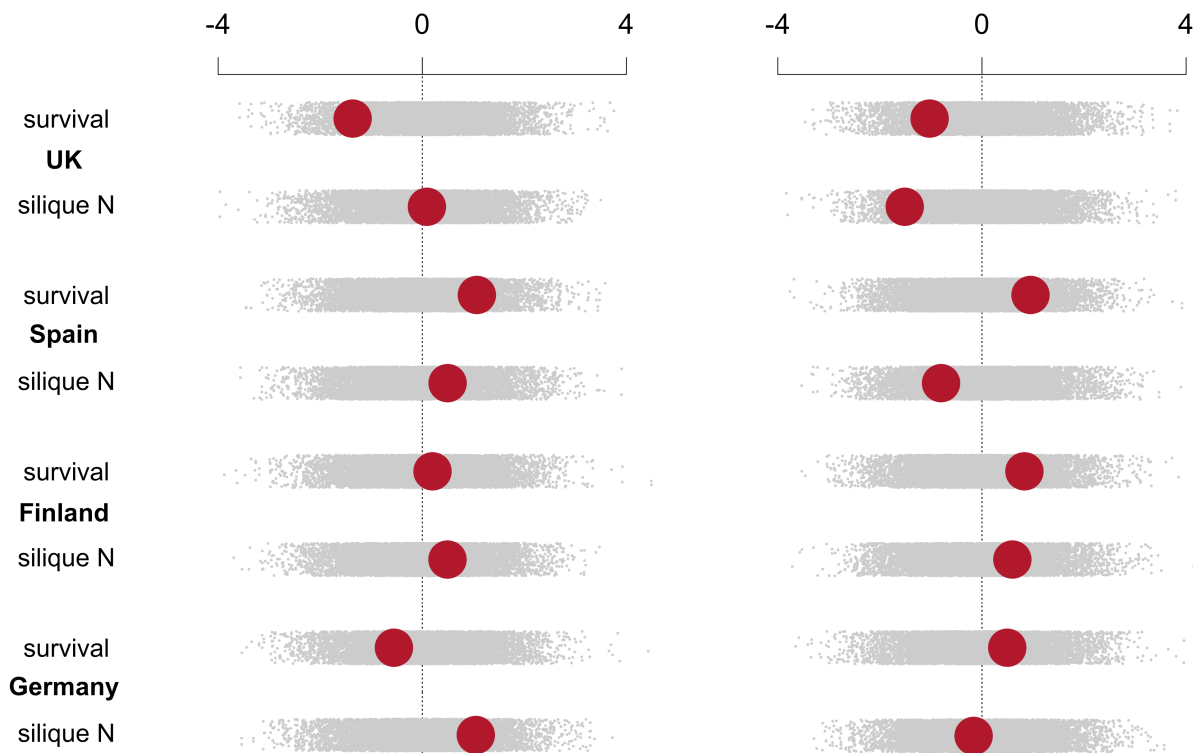

482 **Figure S6.** Quantile-quantile plots for climate association  $t$ -statistics for early-  
483 flowering accessions. Observed distributions (y-axis) are compared with a  
484 theoretical normal distribution (x-axis).

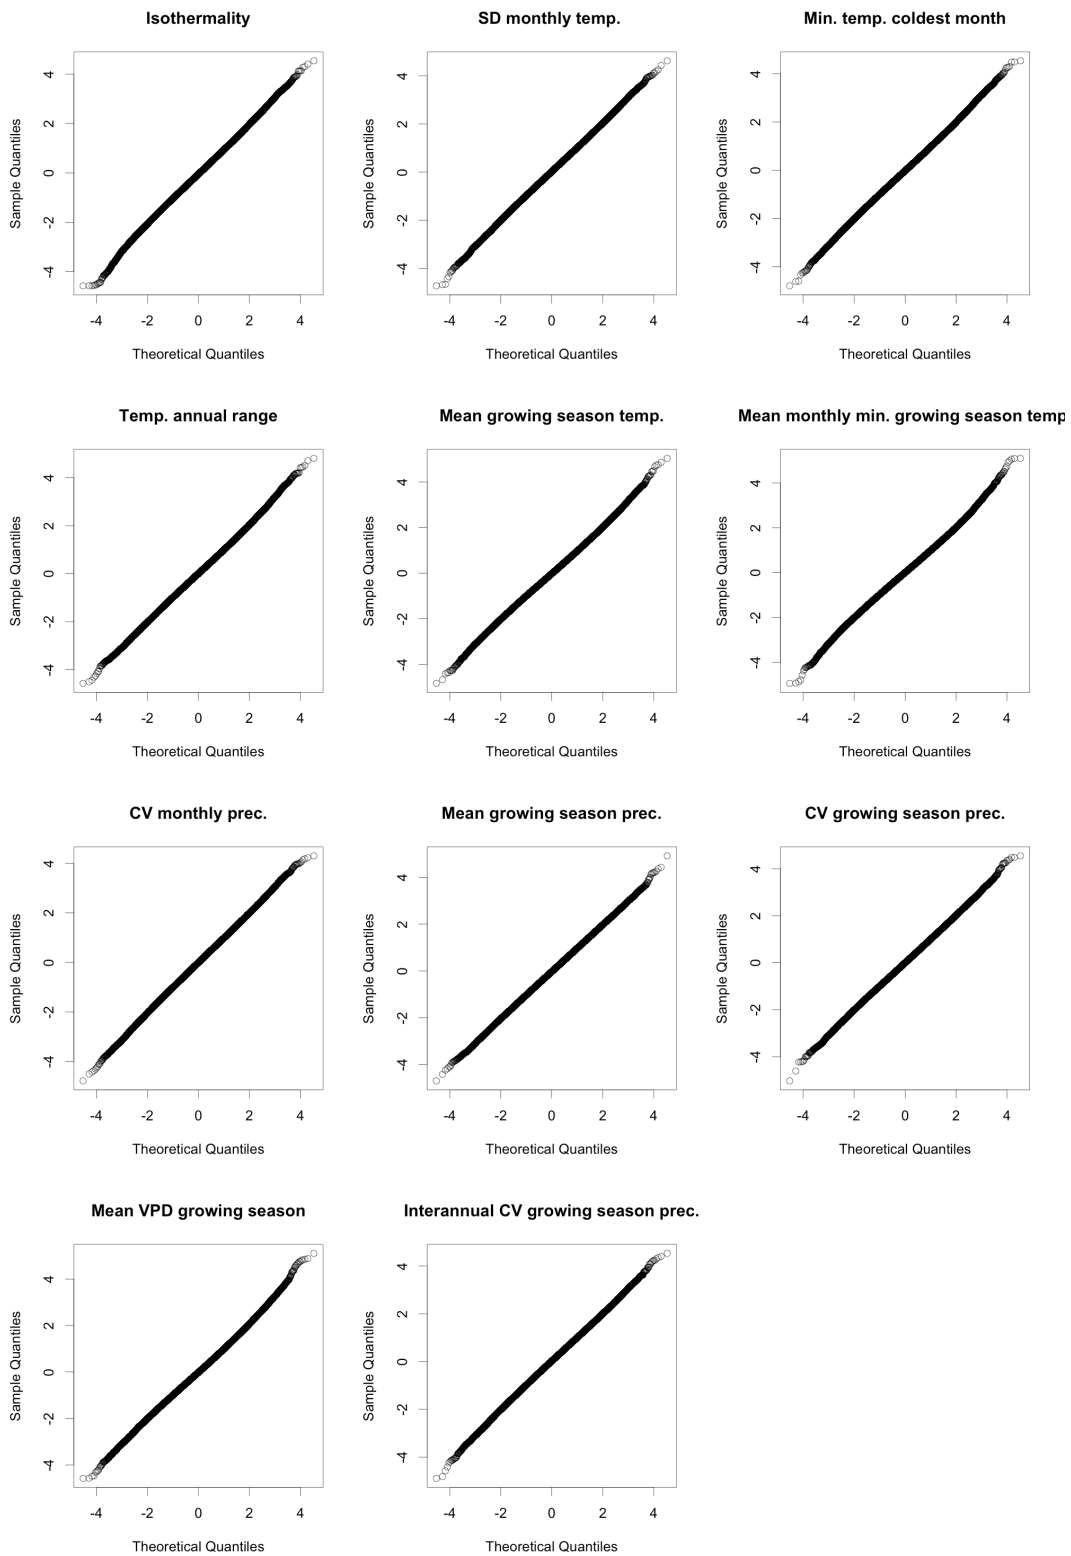

486 **Figure S7.** Quantile-quantile plots for climate association  $t$ -statistics for late-  
487 flowering accessions. Observed distributions (y-axis) are compared with a  
488 theoretical normal distribution (x-axis).

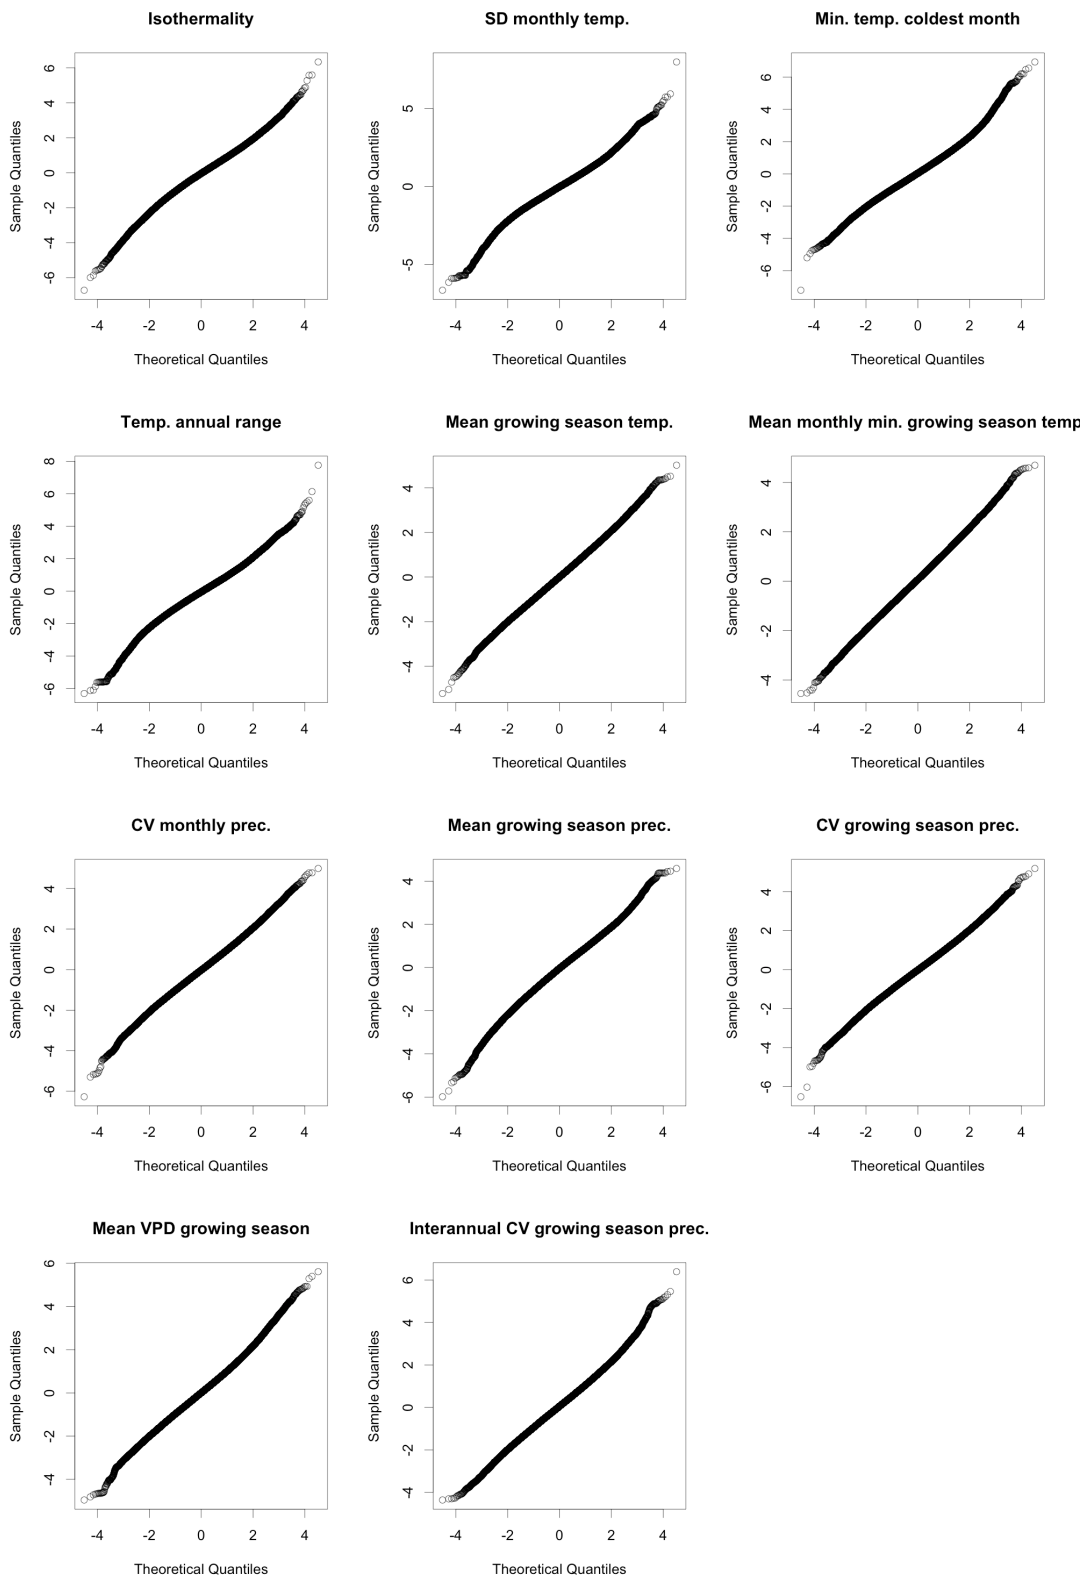

490 **Figure S8.** Quantile-quantile plots for climate association  $t$ -statistics for all  
491 accessions combined. Observed distributions (y-axis) are compared with a  
492 theoretical normal distribution (x-axis).

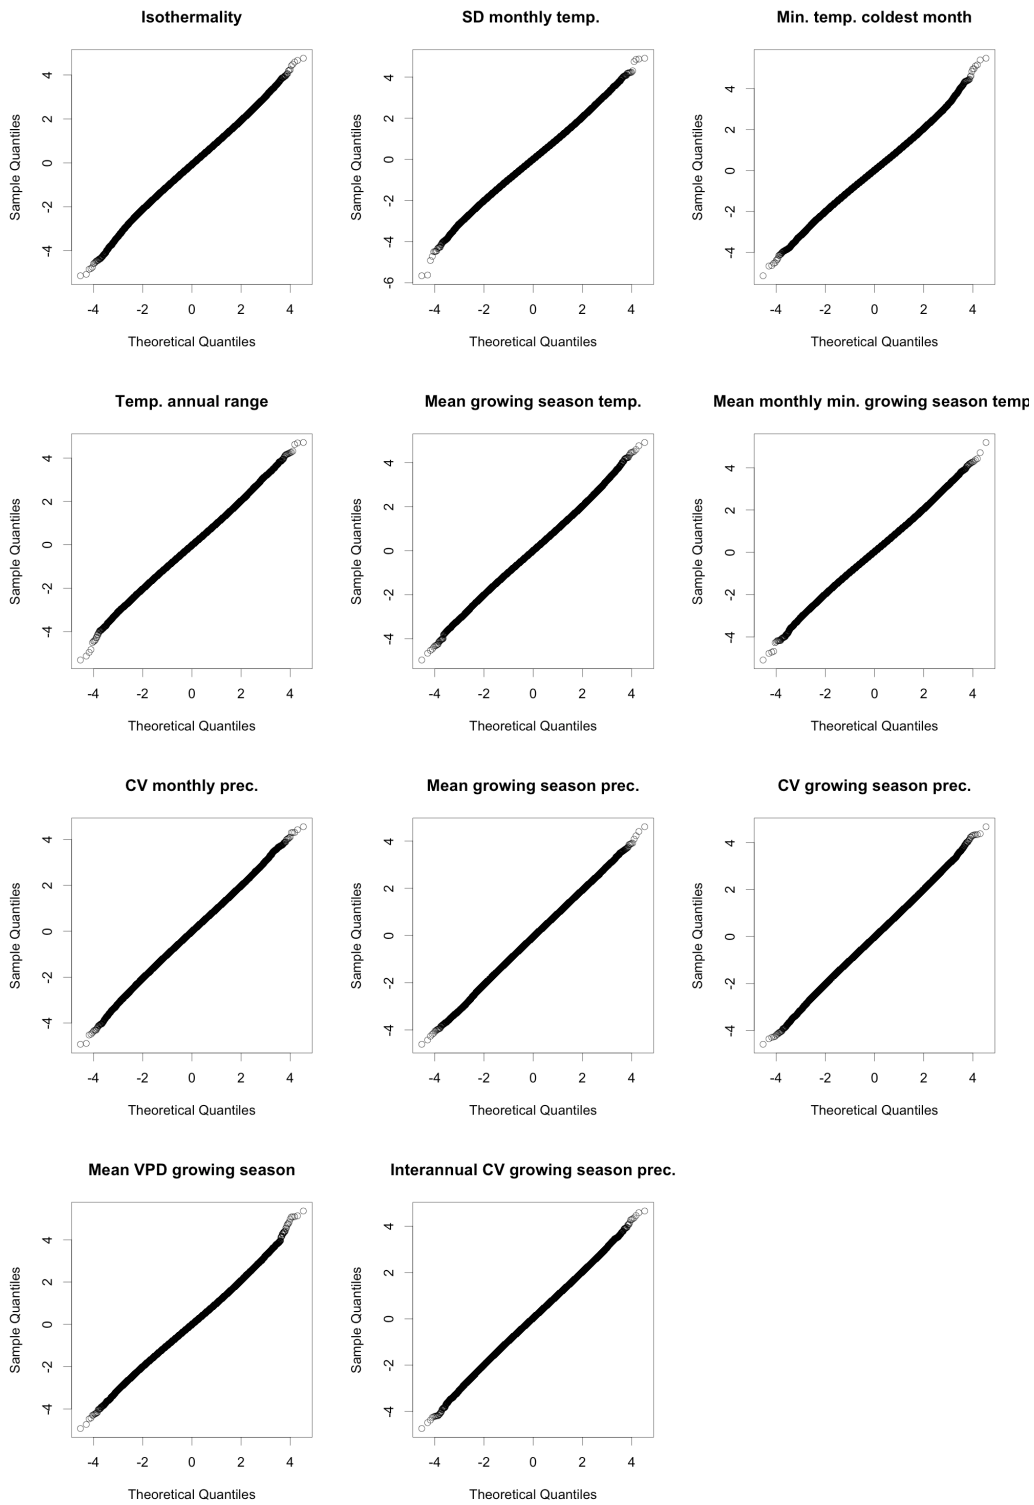

494 **Figure S9.** Quantile-quantile plots for fitness association  $t$ -statistics. Observed  
495 distributions (y-axis) are compared with a theoretical normal distribution (x-axis).

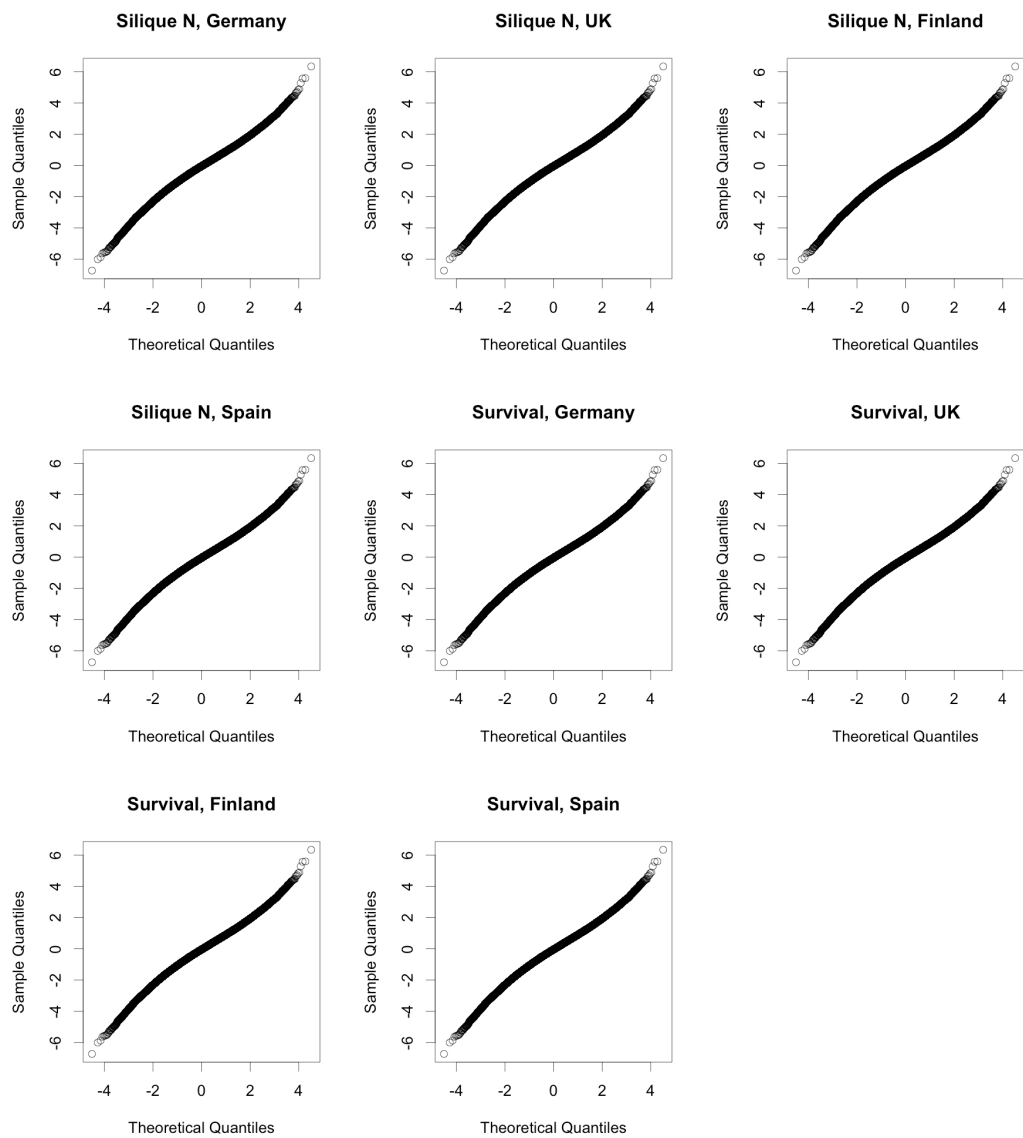

496

497

498

499     *Climate outliers removed*

500     Two high-altitude outlier accessions were removed, Kas-2 and Pi-2. The plots  
501     below show the distribution of climate data for the remaining accessions. Red  
502     lines indicate the boundary between accessions used in association mapping and  
503     outliers excluded.

504     *Among all accessions*

505     CV monthly precipitation, accessions removed: Shahdara, Kondara, Sorbo  
506     SD monthly temperature, accessions removed: Kz-1, Kz-9, Per-1, Rubezhnoe-1,  
507     Stw-0  
508     Minimum temperature coldest month, accessions removed: Kz-1, Kz-9, Per-1  
509     Temperature annual range, accessions removed: Kz-1, Kz-9  
510     Mean growing season precipitation, accessions removed: Ka-0, Oy-0, Ty-0, Ty-1,  
511     UKID115, UKID120  
512     CV growing season precipitation, accessions removed: Kondara  
513     Mean growing season VPD, accessions removed: Lag-1-6  
514     Interannual CV growing season precipitation, accessions removed: Ayu-Dag-3,  
515     Kondara, Kz-1, Kz-9, Shahdara, Sorbo  
516     All other climate variables had no outliers

517

518

519 **Figure S10.** Distributions of climate variables among panels with both early and  
520 late-flowering accessions combined. Red lines show outlier thresholds.

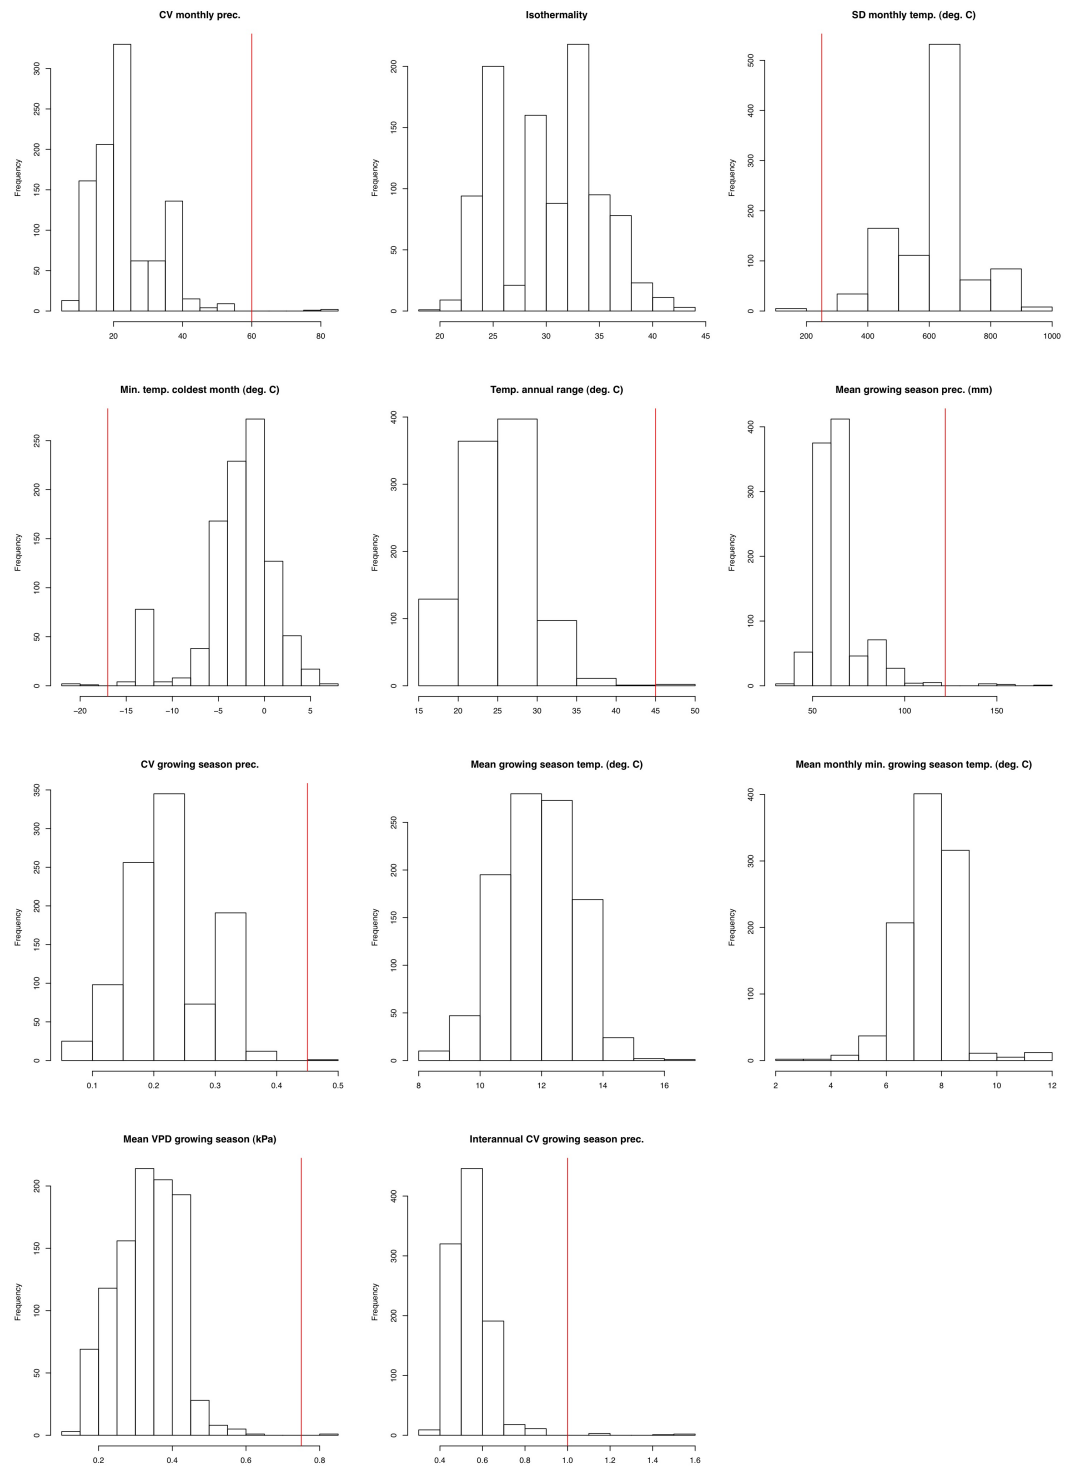

522 *Among early-flowering accessions*

523 CV monthly precipitation, accessions removed: Shahdara, Kondara, Sorbo

524 SD monthly temperature, accessions removed: Kz-1, Kz-9, Per-1, Rubezhnoe-1,

525 Stw-0

526 Minimum temperature coldest month, accessions removed: Kz-1, Kz-9, Per-1

527 Temperature annual range, accessions removed: Kz-1, Kz-9, Per-1

528 Mean growing season precipitation, accessions removed: Ka-0, Oy-0, Ty-0

529 CV growing season precipitation, accessions removed: Kondara

530 Mean growing season temperature, accessions removed: Lag-1-6

531 Mean monthly minimum growing season temperature, accessions removed: Alc-

532 0, Ka-0, Kz-1, Kz-9

533 Mean growing season VPD, accessions removed: Lag-1-6

534 Interannual CV growing season precipitation, accessions removed: Ayu-Dag-3,

535 Kondara, Kz-1, Kz-9, Shahdara, Sorbo

536 All other climate variables had no outliers

537

538 **Figure S11.** Distributions of climate variables among panels with early-flowering  
539 accessions. Red lines show outlier thresholds.

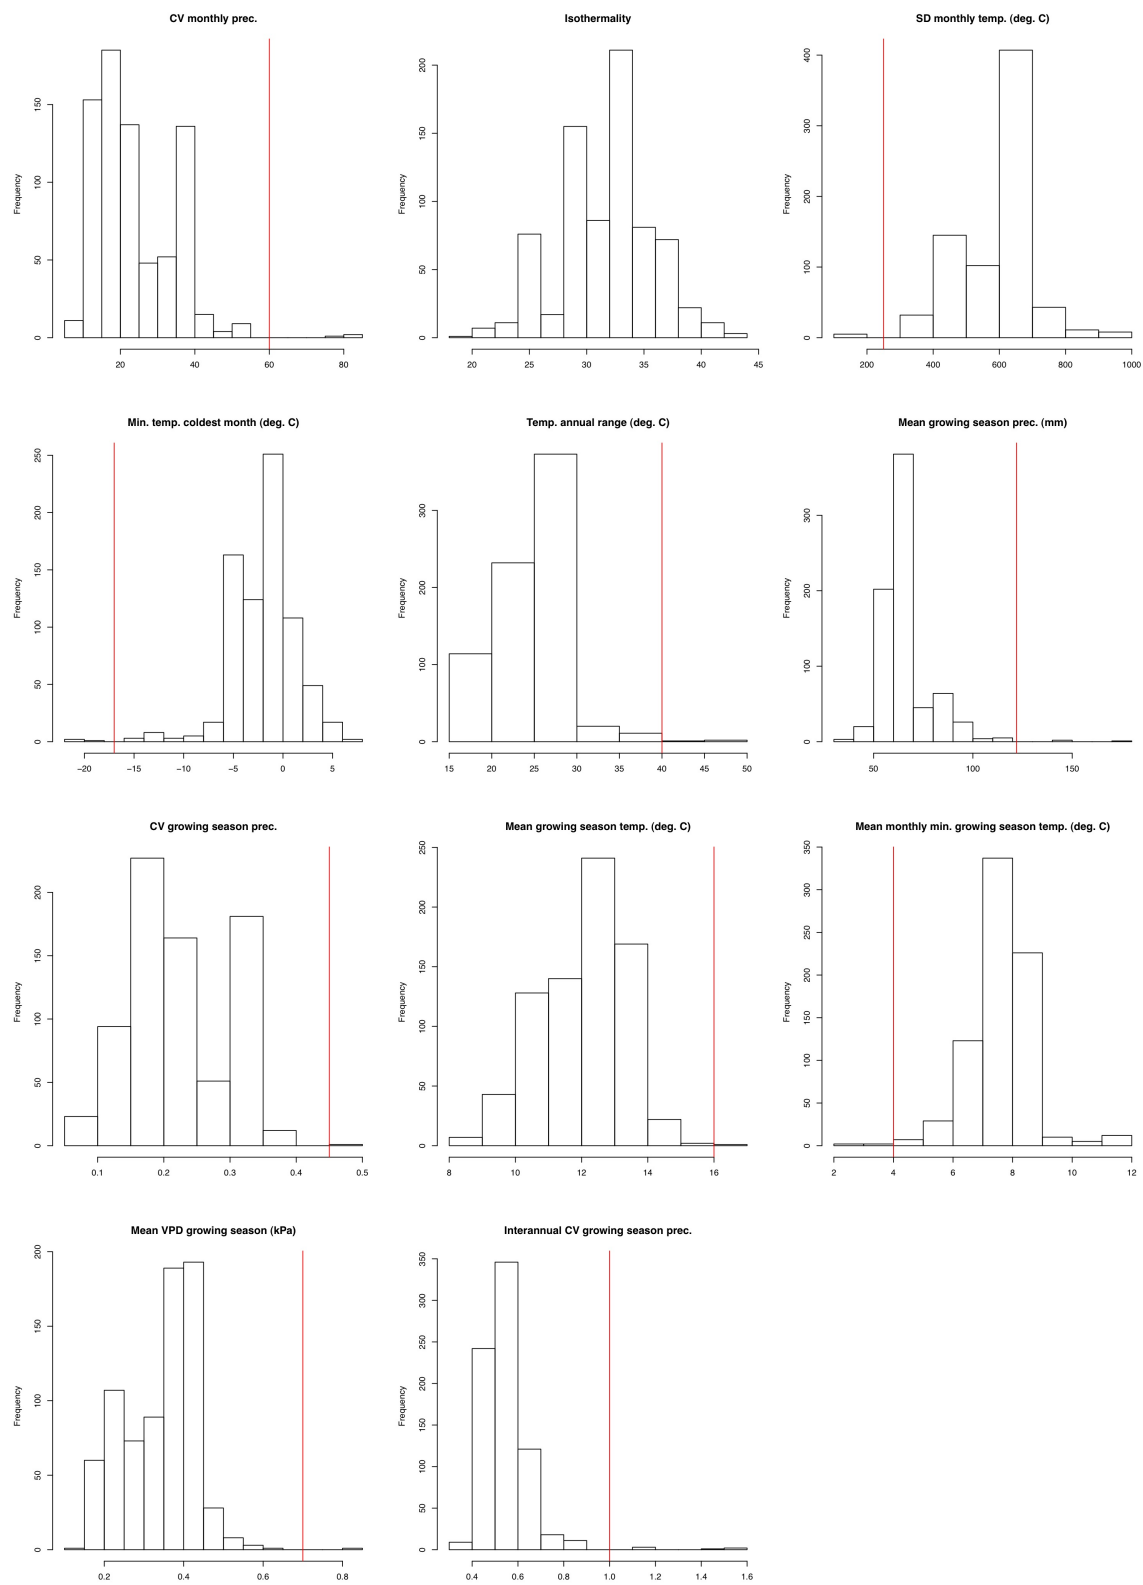

541    *Among late-flowering accessions*

542    Mean growing season precipitation, accessions removed: Ty-1, UKID115,

543    UKID120

544    Mean growing season temperature, accessions removed: Blh-1, Blh-2, Mc-0,

545    UKID115, UKID120

546    Mean monthly minimum growing season temperature, accessions removed: Mc-0

547    Mean growing season VPD, accessions removed: Blh-1 Blh-2

548    All other climate variables had no outliers

549

550

551

552

553

554

555 **Figure S12.** Distributions of climate variables among panels with late-flowering  
556 accessions. Red lines show outlier thresholds.

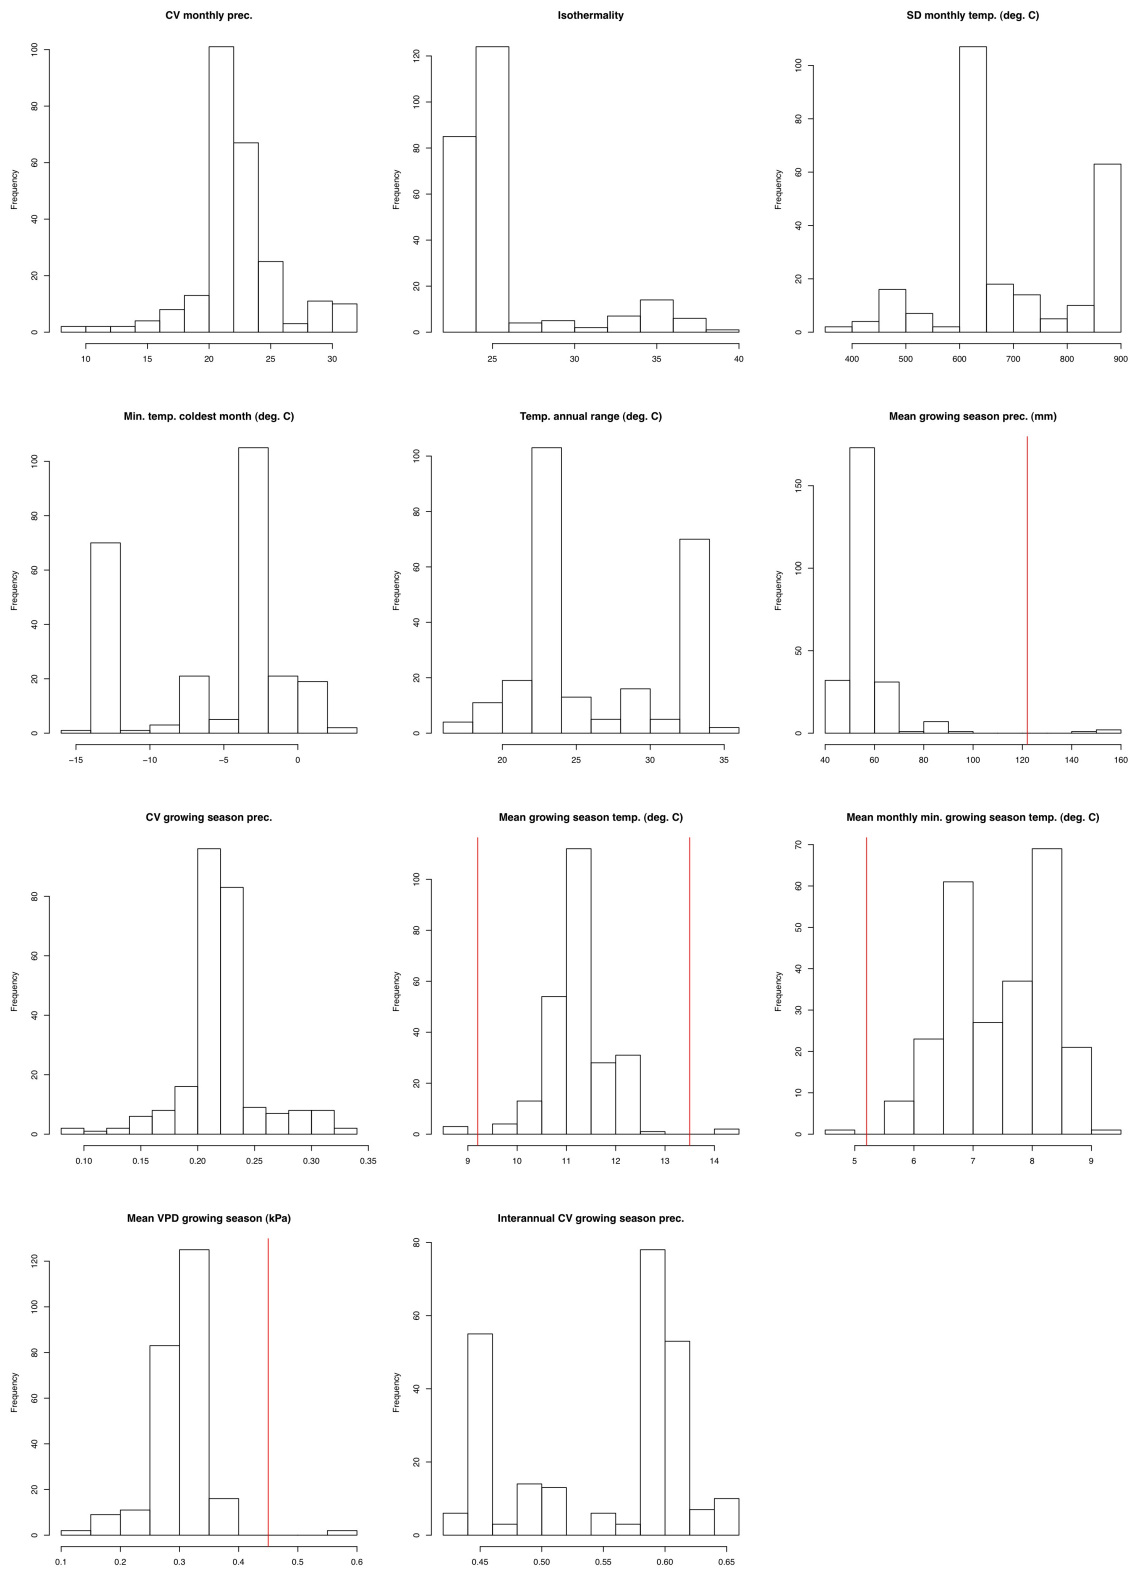

557

558
