# Supplementary material for: Natural Variation in Abiotic Stress Responsive Gene Expression and Local Adaptation to Climate in Arabidopsis thaliana
Source: Oxford University Press journal article supplement (doi:10.1093/molbev/msu170), 2014-05-21
Supplement: msu170_Supplementary_Data.zip [file msu170_Supplementary_Data.zip › LaskyMBE_TableS5.xlsx]

## Sheet: accession_table.csv
Accession abbreviation	Climate & Fst, Lasky et al. 2012	CLR, Horton et al. 2012	PHS, Toomajian et al. 2011	Fitness, Fournier-Level et al. 2011	Cold transcriptome, Hannah et al. 2006	Drought transcriptome, Des Marais et al. 2012	Resequencing, Cao et al. 2011
Ag-0	1	1	1	1	0	1	0
Bur-0	2	2	2	1	0	1	0
C24	1	1	1	1	1	0	0
Fei-0	1	1	1	1	0	0	1
NFA-10	1	1	1	1	0	1	0
Sq-8	1	1	1	1	0	1	0
Tamm-2	1	1	1	1	0	1	0
Ts-1	1	1	1	1	0	1	0
Aa-0	1	1	1	1	0	0	0
Ak-1	1	1	1	1	0	0	0
Alc-0	1	1	1	1	0	0	0
An-1	1	1	1	1	0	0	0
Ang-0	1	1	1	1	0	0	0
Bay-0	1	1	1	1	0	0	0
Bd-0	1	1	1	1	0	0	0
Bil-5	1	1	1	0	0	1	0
Bla-1	2	2	2	1	0	0	0
Blh-2	1	1	1	1	0	0	0
Bor-4	1	1	1	1	0	0	0
Bs-1	1	1	1	1	0	0	0
Bsch-0	1	1	1	1	0	0	0
Bu-0	1	1	1	1	0	0	0
Ca-0	1	1	1	1	0	0	0
Cen-0	1	1	1	1	0	0	0
Cha-0	1	1	1	1	0	0	0
Chat-1	1	1	1	1	0	0	0
CIBC-17	1	1	1	0	0	1	0
CIBC-5	1	1	1	1	0	0	0
Co	1	1	1	0	1	0	0
Co-2	1	1	1	1	0	0	0
Db-0	1	1	1	1	0	0	0
Eden-1	1	1	1	0	0	1	0
Edi-0	1	1	1	1	0	0	0
Ei-2	1	1	1	1	0	0	0
Ema-1	2	2	2	1	0	0	0
Ep-0	1	1	1	1	0	0	0
Es-0	1	1	1	1	0	0	0
Est-1	1	1	1	1	0	0	0
Ga-0	1	1	1	1	0	0	0
Gd-1	1	1	1	1	0	0	0
Ge-1	1	1	1	1	0	0	0
Gy-0	1	1	1	1	0	0	0
Hi-0	1	1	1	1	0	0	0
Hl-3	1	1	1	1	0	0	0
Hn-0	1	1	1	1	0	0	0
HR-10	1	1	1	1	0	0	0
HR-5	1	1	1	0	0	1	0
Hs-0	1	1	1	1	0	0	0
In-0	1	1	1	1	0	0	0
Is-0	1	1	1	1	0	0	0
Ka-0	1	1	1	1	0	0	0
Kas-2	1	1	1	1	0	0	0
Kn-0	1	1	1	1	0	0	0
Ksk-1	1	1	1	1	0	0	0
Lc-0	1	1	1	1	0	0	0
Lip-0	1	1	1	1	0	0	0
LL-0	1	1	1	1	0	0	0
Ll-2	1	1	1	1	0	0	0
Lm-2	1	1	1	1	0	0	0
Lp2-2	1	1	1	1	0	0	0
Lp2-6	1	1	1	1	0	0	0
Lu-1	1	1	1	1	0	0	0
Lz-0	1	1	1	1	0	0	0
Mc-0	1	1	1	1	0	0	0
Mh-1	1	1	1	1	0	0	0
Mir-0	1	1	1	1	0	0	0
Mnz-0	1	1	1	1	0	0	0
Mrk-0	1	1	1	1	0	0	0
Ms-0	1	1	1	1	0	0	0
Mz-0	1	1	1	1	0	0	0
N7	1	1	1	1	0	0	0
Nc-1	1	1	1	1	0	0	0
Nd-1	1	1	1	1	0	0	0
No-0	1	1	1	1	0	0	0
Nok-3	1	1	1	1	0	0	0
ÖMö2-3	1	1	1	0	0	1	0
Or-0	1	1	1	1	0	0	0
Ost-0	1	1	1	1	0	0	0
Pa-1	1	1	1	1	0	0	0
Pa-2	1	1	1	1	0	0	0
Per-1	1	1	1	1	0	0	0
Petergof	1	1	1	1	0	0	0
PHW-2	1	1	1	1	0	0	0
Pla-0	2	2	2	1	0	0	0
Pn-0	1	1	1	1	0	0	0
Pro-0	1	1	1	1	0	0	0
Pu2-23	1	1	1	1	0	0	0
Ra-0	1	1	1	1	0	0	0
Rak-2	1	1	1	1	0	0	0
Rd-0	2	2	2	1	0	0	0
Rld-2	1	1	1	1	0	0	0
Sap-0	1	1	1	1	0	0	0
Se-0	1	1	1	1	0	0	0
Sf-2	1	1	1	1	0	0	0
Sg-1	1	1	1	1	0	0	0
Sh-0	1	1	1	1	0	0	0
Si-0	1	1	1	1	0	0	0
Sq-1	1	1	1	1	0	0	0
Ste-0	1	1	1	1	0	0	0
Stw-0	1	1	1	1	0	0	0
Tamm-27	1	1	1	1	0	0	0
Te-0	1	1	1	1	0	0	0
Ts-5	1	1	1	1	0	0	0
Ty-0	1	1	1	1	0	0	0
Uk-4	1	1	1	1	0	0	0
Ull2-3	1	1	1	1	0	0	0
Ull2-5	1	1	1	0	0	1	0
Uod-1	1	1	1	1	0	0	0
Uod-7	1	1	1	1	0	0	0
Utrecht	1	1	1	1	0	0	0
Vi-0	1	1	1	1	0	0	0
Wa-1	1	1	2	1	0	0	0
Wei-0	1	1	1	1	0	0	0
Wei-1	1	1	1	1	0	0	0
Wil-2	1	1	1	1	0	0	0
Ws-0	1	1	1	1	0	0	0
Wt-5	1	1	1	1	0	0	0
Zdr-1	1	1	1	1	0	0	0
Zdr-6	1	1	1	1	0	0	0
Zu-1	1	1	1	1	0	0	0
02B6	1	1	1	0	0	0	0
09A3	1	1	1	0	0	0	0
12A1	1	1	1	0	0	0	0
13B5	1	1	1	0	0	0	0
Ådal 1	1	1	1	0	0	0	0
Ådal 3	1	1	1	0	0	0	0
Ale-Stenar-41-1	1	1	1	0	0	0	0
Ale-Stenar-44-4	1	1	1	0	0	0	0
Ale-Stenar-50-11	1	1	1	0	0	0	0
Ale-Stenar-56-14	1	1	1	0	0	0	0
Ale-Stenar-57-16	1	1	1	0	0	0	0
Ale-Stenar-64-24	1	1	1	0	0	0	0
Ale-Stenar-77-31	1	1	1	0	0	0	0
Aledal-1-34	1	1	1	0	0	0	0
Aledal-11-63	1	1	1	0	0	0	0
Aledal-14-73	1	1	1	0	0	0	0
Aledal-17-82	1	1	1	0	0	0	0
Algutsrum	1	1	1	0	0	0	0
ALL1-3	1	1	1	0	0	0	0
ALL1-6	1	1	1	0	0	0	0
ALL1-7	1	1	1	0	0	0	0
ALL1-8	1	1	1	0	0	0	0
ALL1-9	1	1	1	0	0	0	0
ALL2-4	1	1	1	0	0	0	0
Alst-1	1	1	1	0	0	0	0
Ängsö-57-419	1	1	1	0	0	0	0
Ängsö-59-422	1	1	1	0	0	0	0
Ängsö-74-430	1	1	1	0	0	0	0
Ängsö-80-432	1	1	1	0	0	0	0
Ann-1	1	1	1	0	0	0	0
App1-12	1	1	1	0	0	0	0
App1-14	1	1	1	0	0	0	0
App1-16	1	1	1	0	0	0	0
Arby-1	1	1	1	0	0	0	0
Ayu-Dag-3	1	1	1	0	0	0	0
Bå4-1	1	1	1	0	0	0	0
Bå5-1	1	1	1	0	0	0	0
Baa-1	1	1	1	0	0	0	0
Bar 1	1	1	1	0	0	0	0
Bch-1	1	1	1	0	0	0	0
Bea-1	1	1	1	0	0	0	0
Belmonte-4-94	1	1	1	0	0	0	0
Benk-1	1	1	1	0	0	0	0
Bid-1	1	1	1	0	0	0	0
Bil-3	1	1	1	0	0	0	0
Bil-7	1	1	1	0	0	0	0
Bla-11	1	1	1	0	0	0	0
Bla-6	1	1	1	0	0	0	0
Blh-1	1	1	2	0	0	0	0
Bön 1	1	1	1	0	0	0	0
Boo2-1	1	1	1	0	0	0	0
Boo2-3	1	1	1	0	0	0	0
Boot-1	1	1	1	0	0	0	0
Bor-1	1	1	0	1	0	0	0
Böt 1	1	1	1	0	0	0	0
Böt 4	1	1	1	0	0	0	0
Bra-1	1	1	1	0	0	0	0
Brö1-6	1	1	1	0	0	0	0
Brösarp-21-140	1	1	1	0	0	0	0
Brösarp-25-142	1	1	1	0	0	0	0
Brösarp-51-157	1	1	1	0	0	0	0
Brösarp-53-159	1	1	1	0	0	0	0
Bs-2	1	1	1	0	0	0	0
Bsch-2	1	1	1	0	0	0	0
Cal-2	1	1	1	0	0	0	0
Cala-8	1	1	1	0	0	0	0
CAM-16	1	1	1	0	0	0	0
CAM-25	1	1	1	0	0	0	0
CAM-42	1	1	1	0	0	0	0
CAM-45	1	1	1	0	0	0	0
CAM-48	1	1	1	0	0	0	0
CAM-56	1	1	1	0	0	0	0
CAM-58	1	1	1	0	0	0	0
CAM-61	1	1	1	0	0	0	0
CAM-64	1	1	1	0	0	0	0
CAM-7	1	1	1	0	0	0	0
Can-0	0	1	1	1	0	0	0
Chi-1	1	1	1	0	0	0	0
Chr-1	1	1	1	0	0	0	0
CIBC-2	1	1	1	0	0	0	0
CIBC-4	1	1	1	0	0	0	0
Cit-0	1	1	1	0	0	0	0
Cnt-1	1	1	1	0	0	0	0
Co-3	1	1	1	0	0	0	0
Co-4	1	1	1	0	0	0	0
Coc-1	1	1	1	0	0	0	0
Com-1	1	1	1	0	0	0	0
Crl-1	1	1	1	0	0	0	0
CUR-10	1	1	1	0	0	0	0
CUR-2	1	1	1	0	0	0	0
CUR-3	1	1	1	0	0	0	0
CUR-5	1	1	1	0	0	0	0
CUR-6	1	1	1	0	0	0	0
CUR-7	1	1	1	0	0	0	0
CUR-8	1	1	1	0	0	0	0
CUR-9	1	1	1	0	0	0	0
CYR	1	1	1	0	0	0	0
DAM1	1	1	1	0	0	0	0
Di-1	1	1	1	0	0	0	0
Dja 1	1	1	1	0	0	0	0
Dja 2	1	1	1	0	0	0	0
Djk 3	1	1	1	0	0	0	0
Do-0	1	1	1	0	0	0	0
Död 1	1	1	1	0	0	0	0
Död 2	1	1	1	0	0	0	0
Död 3	1	1	1	0	0	0	0
Dör-10	1	1	1	0	0	0	0
Dra-1	1	1	1	0	0	0	0
Dra-2	1	1	1	0	0	0	0
Dra-3	1	1	1	0	0	0	0
Dra1-4	1	1	1	0	0	0	0
Dra2-1	1	1	1	0	0	0	0
Dra3-1	1	1	1	0	0	0	0
Dra3-9	1	1	1	0	0	0	0
DraII-1	1	1	1	0	0	0	0
DraIII-1	1	1	1	0	0	0	0
DraIV 1-14	1	1	1	0	0	0	0
DraIV 1-5	1	1	1	0	0	0	0
DraIV 6-16	1	1	1	0	0	0	0
DraIV 6-35	1	1	1	0	0	0	0
Duk	1	1	1	0	0	0	0
Ede-1	1	1	1	0	0	0	0
Eden 15	1	1	1	0	0	0	0
Eden 16	1	1	1	0	0	0	0
Eden 17	1	1	1	0	0	0	0
Eden-2	1	1	1	0	0	0	0
Eden-4	1	1	1	0	0	0	0
Eden-5	1	1	1	0	0	0	0
Eden-6	1	1	1	0	0	0	0
Eden-7	1	1	1	0	0	0	0
Eden-9	1	1	1	0	0	0	0
Edi-2	1	1	1	0	0	0	0
Edinburgh-5	1	1	1	0	0	0	0
Edinburgh-8	1	1	1	0	0	0	0
EdJ 2	1	1	1	0	0	0	0
Eds-1	1	1	1	0	0	0	0
Eds-9	1	1	1	0	0	0	0
EkN 3	1	1	1	0	0	0	0
EkS 2	1	1	1	0	0	0	0
EM-134	1	1	1	0	0	0	0
EM-183	1	1	1	0	0	0	0
En-T	1	1	1	0	0	0	0
Fäb-2	1	1	1	0	0	0	0
Fäb-4	1	1	1	0	0	0	0
FäL 1	1	1	1	0	0	0	0
FäU 4	1	1	1	0	0	0	0
Fi-1	1	1	1	0	0	0	0
Fjä1-1	1	1	1	0	0	0	0
Fjä1-2	1	1	1	0	0	0	0
Fjä1-5	1	1	1	0	0	0	0
Fjä2-4	1	1	1	0	0	0	0
Fjä2-6	1	1	1	0	0	0	0
Fly2-1	1	1	1	0	0	0	0
Fly2-2	1	1	1	0	0	0	0
FlyA 3	1	1	1	0	0	0	0
For-2	1	1	1	0	0	0	0
Fr-4	1	1	1	0	0	0	0
Frd-1	1	1	1	0	0	0	0
Fri 1	1	1	1	0	0	0	0
Fri 2	1	1	1	0	0	0	0
Fri 3	1	1	1	0	0	0	0
Frö 1	1	1	1	0	0	0	0
Frö 3	1	1	1	0	0	0	0
Ge-0	1	1	1	0	0	0	0
Gel-1	1	1	1	0	0	0	0
Go-0	1	1	1	0	0	0	0
Go-2	1	1	1	0	0	0	0
Got-22	1	1	0	0	0	1	0
Gro-3	1	1	1	0	0	0	0
Grön 12	1	1	1	0	0	0	0
Grön 14	1	1	1	0	0	0	0
Grön-5	1	1	1	0	0	0	0
Gu-0	2	2	2	0	0	0	0
Gu-1	1	1	1	0	0	0	0
Had 1	1	1	1	0	0	0	0
Had 2	1	1	1	0	0	0	0
Had 3	1	1	1	0	0	0	0
Ham 1	1	1	1	0	0	0	0
Ham-10-239	1	1	1	0	0	0	0
Ham-2-228	1	1	1	0	0	0	0
Ham-27-256	1	1	1	0	0	0	0
Ham-6-232	1	1	1	0	0	0	0
Ham-7-233	1	1	1	0	0	0	0
Hau-0	1	1	1	0	0	0	0
Hel 3	1	1	1	0	0	0	0
Hen-16-268	1	1	1	0	0	0	0
Hey-1	1	1	1	0	0	0	0
Hh-0	1	1	1	0	0	0	0
Hil-1	1	1	1	0	0	0	0
Hod	1	1	1	0	0	0	0
HolA1 1	1	1	1	0	0	0	0
HolA1 2	1	1	1	0	0	0	0
HolA2 2	1	1	1	0	0	0	0
Hov1-10	1	1	1	0	0	0	0
Hov1-7	1	1	1	0	0	0	0
Hov3-2	1	1	1	0	0	0	0
Hov3-5	1	1	1	0	0	0	0
Hov4-1	1	1	1	0	0	0	0
Hovdala-2	1	1	1	0	0	0	0
Hovdala-6	1	1	1	0	0	0	0
HSm	1	1	1	0	0	0	0
Igt-1	1	1	1	0	0	0	0
Is-1	1	1	1	0	0	0	0
Je54	1	1	1	0	0	0	0
Jl-2	1	1	1	0	0	0	0
Jl-3	1	1	1	0	0	0	0
Jl-4	1	1	1	0	0	0	0
Jm-1	1	1	1	0	0	0	0
Kal 1	1	1	1	0	0	0	0
Kävlinge-1	1	1	1	0	0	0	0
Kelsterbach-2	1	1	1	0	0	0	0
Kelsterbach-4	1	1	1	0	0	0	0
Kia 1	1	1	1	0	0	0	0
Kl-1	1	1	1	0	0	0	0
Kni-1	1	1	1	0	0	0	0
Kno-18	0	1	1	0	0	1	0
Köln	1	1	1	0	0	0	0
Kondara	1	1	0	1	0	0	0
Kor 1	1	1	1	0	0	0	0
Kor 2	1	1	1	0	0	0	0
Kor 3	1	1	1	0	0	0	0
Kor 4	1	1	1	0	0	0	0
Kr-0	1	1	1	0	0	0	0
Kro-0	1	1	1	0	0	0	0
Krot-2	1	1	1	0	0	0	0
Kru 3	1	1	1	0	0	0	0
Ksk-2	1	1	1	0	0	0	0
Kulturen-1	1	1	1	0	0	0	0
Kva 2	1	1	1	0	0	0	0
Kz-1	1	1	1	0	0	0	0
Kz-9	1	1	1	0	0	0	0
LAC-3	1	1	1	0	0	0	0
LAC-5	1	1	1	0	0	0	0
Lag 1	1	1	1	0	0	0	0
Lag1-6	1	1	1	0	0	0	0
Lan 1	1	1	1	0	0	0	0
Lan-1	1	1	1	0	0	0	0
LDV-14	1	1	1	0	0	0	0
LDV-16	1	1	1	0	0	0	0
LDV-25	1	1	1	0	0	0	0
LDV-3	1	1	1	0	0	0	0
LDV-30	1	1	1	0	0	0	0
LDV-31	1	1	1	0	0	0	0
LDV-34	1	1	1	0	0	0	0
LDV-53	1	1	1	0	0	0	0
LDV-57	1	1	1	0	0	0	0
LDV-58	1	1	1	0	0	0	0
LDV-6	1	1	1	0	0	0	0
LDV-68	1	1	1	0	0	0	0
LDV-8	1	1	1	0	0	0	0
Lerik1-6	1	1	1	0	0	0	0
Lha-1	1	1	1	0	0	0	0
Li-5:2	1	1	1	0	0	0	0
Li-5:3	1	1	1	0	0	0	0
Li-6	1	1	1	0	0	0	0
Lillö-1	1	1	1	0	0	0	0
Lis-2	1	1	1	0	0	0	0
Lis-3	1	1	1	0	0	0	0
Lisse	1	1	1	0	0	0	0
Ll-1	1	1	1	0	0	0	0
Lo-2	1	1	1	0	0	0	0
Löv-1	1	1	1	0	0	0	0
Löv-5	1	1	1	0	0	0	0
Lund	1	1	1	0	0	0	0
MAR2-3	1	1	1	0	0	0	0
Mh-0	1	1	1	0	0	0	0
MIB-1	1	1	1	0	0	0	0
MIB-100	1	1	1	0	0	0	0
MIB-11	1	1	1	0	0	0	0
MIB-14	1	1	1	0	0	0	0
MIB-15	1	1	1	0	0	0	0
MIB-16	1	1	1	0	0	0	0
MIB-17	1	1	1	0	0	0	0
MIB-19	1	1	1	0	0	0	0
MIB-2	1	1	1	0	0	0	0
MIB-20	1	1	1	0	0	0	0
MIB-22	1	1	1	0	0	0	0
MIB-23	1	1	1	0	0	0	0
MIB-24	1	1	1	0	0	0	0
MIB-28	1	1	1	0	0	0	0
MIB-29	1	1	1	0	0	0	0
MIB-32	1	1	1	0	0	0	0
MIB-33	1	1	1	0	0	0	0
MIB-34	1	1	1	0	0	0	0
MIB-35	1	1	1	0	0	0	0
MIB-36	1	1	1	0	0	0	0
MIB-37	1	1	1	0	0	0	0
MIB-39	1	1	1	0	0	0	0
MIB-40	1	1	1	0	0	0	0
MIB-43	1	1	1	0	0	0	0
MIB-47	1	1	1	0	0	0	0
MIB-50	1	1	1	0	0	0	0
MIB-54	1	1	1	0	0	0	0
MIB-55	1	1	1	0	0	0	0
MIB-57	1	1	1	0	0	0	0
MIB-58	1	1	1	0	0	0	0
MIB-60	1	1	1	0	0	0	0
MIB-61	1	1	1	0	0	0	0
MIB-62	1	1	1	0	0	0	0
MIB-63	1	1	1	0	0	0	0
MIB-64	1	1	1	0	0	0	0
MIB-67	1	1	1	0	0	0	0
MIB-69	1	1	1	0	0	0	0
MIB-70	1	1	1	0	0	0	0
MIB-73	1	1	1	0	0	0	0
MIB-75	1	1	1	0	0	0	0
MIB-76	1	1	1	0	0	0	0
MIB-77	1	1	1	0	0	0	0
MIB-80	1	1	1	0	0	0	0
MIB-83	1	1	1	0	0	0	0
MIB-84	1	1	1	0	0	0	0
MIB-86	1	1	1	0	0	0	0
MIB-87	1	1	1	0	0	0	0
MIB-89	1	1	1	0	0	0	0
MIB-9	1	1	1	0	0	0	0
MIB-90	1	1	1	0	0	0	0
MIB-92	1	1	1	0	0	0	0
MIB-93	1	1	1	0	0	0	0
MOG-11	1	1	1	0	0	0	0
MOG-12	1	1	1	0	0	0	0
MOG-37	1	1	1	0	0	0	0
MOG-40	1	1	1	0	0	0	0
MOG-55	1	1	1	0	0	0	0
N13	1	1	1	0	0	0	0
N4	1	1	1	0	0	0	0
Näs 2	1	1	1	0	0	0	0
Nd-0	1	1	1	0	0	0	0
NFA-8	1	1	1	0	0	0	0
NFC-20	1	1	1	0	0	0	0
Nok-1	1	1	1	0	0	0	0
Nw-0	2	2	2	0	0	0	0
Nw-2	1	1	1	0	0	0	0
Nw-4	1	1	1	0	0	0	0
Nyl 13	1	1	1	0	0	0	0
Nyl-2	1	1	1	0	0	0	0
Nyl-7	1	1	1	0	0	0	0
Ob-0	1	1	1	0	0	0	0
Ob-1	1	1	1	0	0	0	0
Öde 2	1	1	1	0	0	0	0
Old-1	1	1	1	0	0	0	0
Old-2	1	1	1	0	0	0	0
Omn-5	1	1	1	0	0	0	0
ÖMö1-7	1	1	1	0	0	0	0
ÖMö2-1	1	1	1	0	0	0	0
Ör-1	1	1	1	0	0	0	0
Ors-1	1	1	1	0	0	0	0
Ors-2	1	1	1	0	0	0	0
Oy-0	1	1	0	1	0	0	0
Pa-3	1	1	1	0	0	0	0
PAR-10	1	1	1	0	0	0	0
PAR-3	1	1	1	0	0	0	0
PAR-4	1	1	1	0	0	0	0
PAR-6	1	1	1	0	0	0	0
PAR-8	1	1	1	0	0	0	0
PAR-9	1	1	1	0	0	0	0
PHW-10	1	1	1	0	0	0	0
PHW-13	1	1	1	0	0	0	0
PHW-14	1	1	1	0	0	0	0
PHW-20	1	1	1	0	0	0	0
PHW-22	1	1	1	0	0	0	0
PHW-26	1	1	1	0	0	0	0
PHW-28	1	1	1	0	0	0	0
PHW-31	1	1	1	0	0	0	0
PHW-33	1	1	1	0	0	0	0
PHW-35	1	1	1	0	0	0	0
PHW-36	1	1	1	0	0	0	0
PHW-37	1	1	1	0	0	0	0
Pi-2	1	1	1	0	0	0	0
Pla-1	1	1	1	0	0	0	0
Pla-3	1	1	1	0	0	0	0
Pna-10	0	1	1	1	0	0	0
Pna-17	0	1	1	1	0	0	0
PON	1	1	1	0	0	0	0
Poo-1	1	1	1	0	0	0	0
Pr-0	1	1	1	0	0	0	0
Pu2-24	1	1	1	0	0	0	0
Pu2-8	1	1	1	0	0	0	0
Puk 2	1	1	1	0	0	0	0
Ren-1	1	1	1	0	0	0	0
Ren-11	1	1	1	0	0	0	0
Rev-1	1	1	1	0	0	0	0
Rev-2	1	1	1	0	0	0	0
Rev-3	1	1	1	0	0	0	0
Rhen-1	1	1	1	0	0	0	0
Röd-17-319	1	1	1	0	0	0	0
Röd-38	1	1	1	0	0	0	0
Röd-45	1	1	1	0	0	0	0
ROM-1	1	1	1	0	0	0	0
ROM-2	1	1	1	0	0	0	0
ROM-9	1	1	1	0	0	0	0
RRS-10	0	1	1	1	0	0	0
RRS-7	0	1	1	1	0	0	0
San-2	1	1	1	0	0	0	0
Sanna-2	1	1	1	0	0	0	0
Sav-0	2	2	2	0	0	0	0
Shahdara	1	1	1	0	0	0	0
Sim 1	1	1	1	0	0	0	0
Sim 2	1	1	1	0	0	0	0
Sim 5	1	1	1	0	0	0	0
Sis-1	1	1	1	0	0	0	0
Sorbo	1	1	1	0	0	0	0
Sp-0	1	1	1	0	0	0	0
Sparta-1	1	1	1	0	0	0	0
Spr1-6	1	1	1	0	0	0	0
Spro 1	1	1	1	0	0	0	0
Spro 2	1	1	1	0	0	0	0
Sr:3	1	1	1	0	0	0	0
Stabby-13	1	1	1	0	0	0	0
Ste 2	1	1	1	0	0	0	0
Ste 3	1	1	1	0	0	0	0
Stu-2	1	1	1	0	0	0	0
Su-1	1	1	1	0	0	0	0
T1000	1	1	1	0	0	0	0
T1010	1	1	1	0	0	0	0
T1020	1	1	1	0	0	0	0
T1030	1	1	1	0	0	0	0
T1040	1	1	1	0	0	0	0
T1050	1	1	1	0	0	0	0
T1060	1	1	1	0	0	0	0
T1070	1	1	1	0	0	0	0
T1080	1	1	1	0	0	0	0
T1090	1	1	1	0	0	0	0
T1110	1	1	1	0	0	0	0
T1120	1	1	1	0	0	0	0
T1130	1	1	1	0	0	0	0
T1150	1	1	1	0	0	0	0
T1160	1	1	1	0	0	0	0
T460	1	1	1	0	0	0	0
T470	1	1	1	0	0	0	0
T510	1	1	1	0	0	0	0
T520	1	1	1	0	0	0	0
T530	1	1	1	0	0	0	0
T540	1	1	1	0	0	0	0
T570	1	1	1	0	0	0	0
T580	1	1	1	0	0	0	0
T590	1	1	1	0	0	0	0
T610	1	1	1	0	0	0	0
T620	1	1	1	0	0	0	0
T630	1	1	1	0	0	0	0
T640	1	1	1	0	0	0	0
T670	1	1	1	0	0	0	0
T680	1	1	1	0	0	0	0
T690	1	1	1	0	0	0	0
T710	1	1	1	0	0	0	0
T720	1	1	1	0	0	0	0
T730	1	1	1	0	0	0	0
T740	1	1	1	0	0	0	0
T750	1	1	1	0	0	0	0
T760	1	1	1	0	0	0	0
T780	1	1	1	0	0	0	0
T790	1	1	1	0	0	0	0
T800	1	1	1	0	0	0	0
T810	1	1	1	0	0	0	0
T840	1	1	1	0	0	0	0
T850	1	1	1	0	0	0	0
T860	1	1	1	0	0	0	0
T880	1	1	1	0	0	0	0
T890	1	1	1	0	0	0	0
T900	1	1	1	0	0	0	0
T920	1	1	1	0	0	0	0
T930	1	1	1	0	0	0	0
T940	1	1	1	0	0	0	0
T950	1	1	1	0	0	0	0
T960	1	1	1	0	0	0	0
T970	1	1	1	0	0	0	0
T980	1	1	1	0	0	0	0
T990	1	1	1	0	0	0	0
TAA 04	1	1	1	0	0	0	0
TAA 14	1	1	1	0	0	0	0
TAA 17	1	1	1	0	0	0	0
TÅD 01	1	1	1	0	0	0	0
TÅD 02	1	1	1	0	0	0	0
TÅD 03	1	1	1	0	0	0	0
TÅD 04	1	1	1	0	0	0	0
TÅD 05	1	1	1	0	0	0	0
TÅD 06	1	1	1	0	0	0	0
TÄL 03	1	1	1	0	0	0	0
TÄL 07	1	1	1	0	0	0	0
TBÖ 01	1	1	1	0	0	0	0
TDr-1	1	1	1	0	0	0	0
TDr-11	1	1	1	0	0	0	0
TDr-13	1	1	1	0	0	0	0
TDr-14	1	1	1	0	0	0	0
TDr-15	1	1	1	0	0	0	0
TDr-16	1	1	1	0	0	0	0
TDr-17	1	1	1	0	0	0	0
TDr-18	1	1	1	0	0	0	0
TDr-2	1	1	1	0	0	0	0
TDr-22	1	1	1	0	0	0	0
TDr-3	1	1	1	0	0	0	0
TDr-4	1	1	1	0	0	0	0
TDr-5	1	1	1	0	0	0	0
TDr-7	1	1	1	0	0	0	0
TDr-8	1	1	1	0	0	0	0
TDr-9	1	1	1	0	0	0	0
TEDEN 02	1	1	1	0	0	0	0
TEDEN 03	1	1	1	0	0	0	0
TFÄ 02	1	1	1	0	0	0	0
TFÄ 04	1	1	1	0	0	0	0
TFÄ 05	1	1	1	0	0	0	0
TFÄ 06	1	1	1	0	0	0	0
TFÄ 07	1	1	1	0	0	0	0
TFÄ 08	1	1	1	0	0	0	0
TGR 01	1	1	1	0	0	0	0
TGR 02	1	1	1	0	0	0	0
Tha-1	1	1	1	0	0	0	0
THÖ 03	1	1	1	0	0	0	0
THÖ 08	1	1	1	0	0	0	0
Tiv-1	1	1	1	0	0	0	0
TNY 04	1	1	1	0	0	0	0
TOM 01	1	1	1	0	0	0	0
TOM 02	1	1	1	0	0	0	0
TOM 03	1	1	1	0	0	0	0
TOM 04	1	1	1	0	0	0	0
TOM 06	1	1	1	0	0	0	0
TOM 07	1	1	1	0	0	0	0
Tomegap-2	1	1	1	0	0	0	0
Tos-31-374	1	1	1	0	0	0	0
Tos-82-387	1	1	1	0	0	0	0
Tos-93-391	1	1	1	0	0	0	0
Tottarp-2	1	1	1	0	0	0	0
TOU-A1-105	1	1	1	0	0	0	0
TOU-A1-109	1	1	1	0	0	0	0
TOU-A1-111	1	1	1	0	0	0	0
TOU-A1-112	1	1	1	0	0	0	0
TOU-A1-114	1	1	1	0	0	0	0
TOU-A1-115	1	1	1	0	0	0	0
TOU-A1-116	1	1	1	0	0	0	0
TOU-A1-117	1	1	1	0	0	0	0
TOU-A1-120	1	1	1	0	0	0	0
TOU-A1-122	1	1	1	0	0	0	0
TOU-A1-124	1	1	1	0	0	0	0
TOU-A1-125	1	1	1	0	0	0	0
TOU-A1-128	1	1	1	0	0	0	0
TOU-A1-129	1	1	1	0	0	0	0
TOU-A1-131	1	1	1	0	0	0	0
TOU-A1-133	1	1	1	0	0	0	0
TOU-A1-134	1	1	1	0	0	0	0
TOU-A1-137	1	1	1	0	0	0	0
TOU-A1-143	1	1	1	0	0	0	0
TOU-A1-18	1	1	1	0	0	0	0
TOU-A1-23	1	1	1	0	0	0	0
TOU-A1-26	1	1	1	0	0	0	0
TOU-A1-27	1	1	1	0	0	0	0
TOU-A1-33	1	1	1	0	0	0	0
TOU-A1-37	1	1	1	0	0	0	0
TOU-A1-39	1	1	1	0	0	0	0
TOU-A1-41	1	1	1	0	0	0	0
TOU-A1-43	1	1	1	0	0	0	0
TOU-A1-47	1	1	1	0	0	0	0
TOU-A1-60	1	1	1	0	0	0	0
TOU-A1-61	1	1	1	0	0	0	0
TOU-A1-62	1	1	1	0	0	0	0
TOU-A1-63	1	1	1	0	0	0	0
TOU-A1-65	1	1	1	0	0	0	0
TOU-A1-66	1	1	1	0	0	0	0
TOU-A1-69	1	1	1	0	0	0	0
TOU-A1-73	1	1	1	0	0	0	0
TOU-A1-74	1	1	1	0	0	0	0
TOU-A1-75	1	1	1	0	0	0	0
TOU-A1-77	1	1	1	0	0	0	0
TOU-A1-79	1	1	1	0	0	0	0
TOU-A1-81	1	1	1	0	0	0	0
TOU-A1-82	1	1	1	0	0	0	0
TOU-A1-84	1	1	1	0	0	0	0
TOU-A1-85	1	1	1	0	0	0	0
TOU-A1-93	1	1	1	0	0	0	0
TOU-A1-96	1	1	1	0	0	0	0
TOU-A1-98	1	1	1	0	0	0	0
TOU-C-1	1	1	1	0	0	0	0
TOU-C-2	1	1	1	0	0	0	0
TOU-D-1	1	1	1	0	0	0	0
TOU-D-5	1	1	1	0	0	0	0
TOU-E-11	1	1	1	0	0	0	0
TOU-E-2	1	1	1	0	0	0	0
TOU-E-7	1	1	1	0	0	0	0
TOU-G-1	1	1	1	0	0	0	0
TOU-H-10	1	1	1	0	0	0	0
TOU-H-12	1	1	1	0	0	0	0
TOU-H-13	1	1	1	0	0	0	0
TOU-H-3	1	1	1	0	0	0	0
TOU-I-1	1	1	1	0	0	0	0
TOU-I-17	1	1	1	0	0	0	0
TOU-I-2	1	1	1	0	0	0	0
TOU-I-6	1	1	1	0	0	0	0
TOU-J-3	1	1	1	0	0	0	0
TOU-K-2	1	1	1	0	0	0	0
TOU-K-3	1	1	1	0	0	0	0
TOU-L-10	1	1	1	0	0	0	0
TOU-L-17	1	1	1	0	0	0	0
TOU-L-5	1	1	1	0	0	0	0
TRÄ 01	1	1	1	0	0	0	0
Truk-5	1	1	1	0	0	0	0
Tscha-1	1	1	1	0	0	0	0
Tur 3	1	1	1	0	0	0	0
Tur 4	1	1	1	0	0	0	0
TV-10	1	1	1	0	0	0	0
TV-22	1	1	1	0	0	0	0
TV-30	1	1	1	0	0	0	0
TV-38	1	1	1	0	0	0	0
TV-4	1	1	1	0	0	0	0
TV-7	1	1	1	0	0	0	0
Ty-1	1	1	1	0	0	0	0
UduI 1-34	1	1	1	0	0	0	0
Uk-1	1	1	1	0	0	0	0
Uk-2	1	1	1	0	0	0	0
UKID100	1	1	1	0	0	0	0
UKID101	1	1	1	0	0	0	0
UKID103	1	1	1	0	0	0	0
UKID108	1	1	1	0	0	0	0
UKID109	1	1	1	0	0	0	0
UKID112	1	1	1	0	0	0	0
UKID113	1	1	1	0	0	0	0
UKID115	1	1	1	0	0	0	0
UKID120	1	1	1	0	0	0	0
UKID14	1	1	1	0	0	0	0
UKID15	1	1	1	0	0	0	0
UKID17	1	1	1	0	0	0	0
UKID2	1	1	1	0	0	0	0
UKID21	1	1	1	0	0	0	0
UKID28	1	1	1	0	0	0	0
UKID32	1	1	1	0	0	0	0
UKID33	1	1	1	0	0	0	0
UKID34	1	1	1	0	0	0	0
UKID35	1	1	1	0	0	0	0
UKID39	1	1	1	0	0	0	0
UKID48	1	1	1	0	0	0	0
UKID51	1	1	1	0	0	0	0
UKID53	1	1	1	0	0	0	0
UKID54	1	1	1	0	0	0	0
UKID55	1	1	1	0	0	0	0
UKID57	1	1	1	0	0	0	0
UKID58	1	1	1	0	0	0	0
UKID64	1	1	1	0	0	0	0
UKID65	1	1	1	0	0	0	0
UKID72	1	1	1	0	0	0	0
UKID75	1	1	1	0	0	0	0
UKID80	1	1	1	0	0	0	0
UKID82	1	1	1	0	0	0	0
UKID83	1	1	1	0	0	0	0
UKID87	1	1	1	0	0	0	0
UKID88	1	1	1	0	0	0	0
UKID9	1	1	1	0	0	0	0
UKID90	1	1	1	0	0	0	0
UKID93	1	1	1	0	0	0	0
UKID95	1	1	1	0	0	0	0
UKID98	1	1	1	0	0	0	0
UKID99	1	1	1	0	0	0	0
UKNW06-019	1	1	1	0	0	0	0
UKNW06-040	1	1	1	0	0	0	0
UKNW06-050	1	1	1	0	0	0	0
UKNW06-059	1	1	1	0	0	0	0
UKNW06-060	1	1	1	0	0	0	0
UKNW06-078	1	1	1	0	0	0	0
UKNW06-079	1	1	1	0	0	0	0
UKNW06-101	1	1	1	0	0	0	0
UKNW06-105	1	1	1	0	0	0	0
UKNW06-170	1	1	1	0	0	0	0
UKNW06-178	1	1	1	0	0	0	0
UKNW06-197	1	1	1	0	0	0	0
UKNW06-202	1	1	1	0	0	0	0
UKNW06-210	1	1	1	0	0	0	0
UKNW06-259	1	1	1	0	0	0	0
UKNW06-306	1	1	1	0	0	0	0
UKNW06-355	1	1	1	0	0	0	0
UKNW06-386	1	1	1	0	0	0	0
UKNW06-410	1	1	1	0	0	0	0
UKNW06-418	1	1	1	0	0	0	0
UKNW06-425	1	1	1	0	0	0	0
UKNW06-436	1	1	1	0	0	0	0
UKNW06-460	1	1	1	0	0	0	0
UKNW06-482	1	1	1	0	0	0	0
UKNW99-010	1	1	1	0	0	0	0
UKNW99-025	1	1	1	0	0	0	0
UKSE06-032	1	1	1	0	0	0	0
UKSE06-062	1	1	1	0	0	0	0
UKSE06-192	1	1	1	0	0	0	0
UKSE06-254	1	1	1	0	0	0	0
UKSE06-272	1	1	1	0	0	0	0
UKSE06-278	1	1	1	0	0	0	0
UKSE06-302	1	1	1	0	0	0	0
UKSE06-311	1	1	1	0	0	0	0
UKSE06-315	1	1	1	0	0	0	0
UKSE06-316	1	1	1	0	0	0	0
UKSE06-349	1	1	1	0	0	0	0
UKSE06-350	1	1	1	0	0	0	0
UKSE06-351	1	1	1	0	0	0	0
UKSE06-373	1	1	1	0	0	0	0
UKSE06-414	1	1	1	0	0	0	0
UKSE06-429	1	1	1	0	0	0	0
UKSE06-466	1	1	1	0	0	0	0
UKSE06-482	1	1	1	0	0	0	0
UKSE06-520	1	1	1	0	0	0	0
UKSE06-544	1	1	1	0	0	0	0
UKSE06-556	1	1	1	0	0	0	0
UKSE06-565	1	1	1	0	0	0	0
UKSE06-581	1	1	1	0	0	0	0
UKSE06-597	1	1	1	0	0	0	0
UKSE06-618	1	1	1	0	0	0	0
UKSE06-622	1	1	1	0	0	0	0
UKSE06-624	1	1	1	0	0	0	0
UKSE06-626	1	1	1	0	0	0	0
UKSE06-628	1	1	1	0	0	0	0
UKSE06-640	1	1	1	0	0	0	0
UKSW06-025	1	1	1	0	0	0	0
UKSW06-070	1	1	1	0	0	0	0
UKSW06-157	1	1	1	0	0	0	0
UKSW06-202	1	1	1	0	0	0	0
UKSW06-220	1	1	1	0	0	0	0
UKSW06-227	1	1	1	0	0	0	0
UKSW06-262	1	1	1	0	0	0	0
UKSW06-280	1	1	1	0	0	0	0
UKSW06-329	1	1	1	0	0	0	0
UKSW06-337	1	1	1	0	0	0	0
Ull1-1	1	1	1	0	0	0	0
Ull1-10	1	1	1	0	0	0	0
Ull2-13	1	1	1	0	0	0	0
Ull2-7	1	1	1	0	0	0	0
UllA 1	1	1	1	0	0	0	0
UllA 2	1	1	1	0	0	0	0
Ullapool-3	1	1	1	0	0	0	0
Ullapool-4	1	1	1	0	0	0	0
Van-0	0	1	1	1	0	0	0
Vår2-1	1	1	1	0	0	0	0
Vår2-6	1	1	1	0	0	0	0
VårA 1	1	1	1	0	0	0	0
Ven-1	1	1	1	0	0	0	0
Vimmerby	1	1	1	0	0	0	0
Vinslöv	1	1	1	0	0	0	0
VM-12	1	1	1	0	0	0	0
VOU-1	1	1	1	0	0	0	0
VOU-10	1	1	1	0	0	0	0
VOU-2	1	1	1	0	0	0	0
VOU-4	1	1	1	0	0	0	0
VOU-6	1	1	1	0	0	0	0
VOU-7	1	1	1	0	0	0	0
VOU-8	1	1	1	0	0	0	0
Wag-3	1	1	1	0	0	0	0
Wag-4	1	1	1	0	0	0	0
Wag-5	1	1	1	0	0	0	0
Wc-1	1	1	1	0	0	0	0
Wis-1	1	1	1	0	0	0	0
Wl-0	1	1	1	0	0	0	0
Wt-1	1	1	1	0	0	0	0
Wt-3	1	1	1	0	0	0	0
Yst 1	1	1	1	0	0	0	0
Yst 2	1	1	1	0	0	0	0
ZdrI 2-24	1	1	1	0	0	0	0
ZdrI 2-25	1	1	1	0	0	0	0
1130PNA1.10	0	1	1	0	0	0	0
11ME1.23	0	1	1	0	0	0	0
11ME1.32	0	1	1	0	0	0	0
11ME1.34	0	1	1	0	0	0	0
11ME1.41	0	1	1	0	0	0	0
11ME1.42	0	1	1	0	0	0	0
11ME1.44	0	1	1	0	0	0	0
11ME2.10	0	1	1	0	0	0	0
11ME2.12	0	1	1	0	0	0	0
11ME2.5	0	1	1	0	0	0	0
11PNA1.15	0	1	1	0	0	0	0
11PNA1.4	0	1	1	0	0	0	0
11PNA1.6	0	1	1	0	0	0	0
11PNA1.9	0	1	1	0	0	0	0
11PNA3.18	0	1	1	0	0	0	0
11PNA3.19	0	1	1	0	0	0	0
11PNA3.63	0	1	1	0	0	0	0
11PNA3.65	0	1	1	0	0	0	0
11PNA3.71	0	1	1	0	0	0	0
11PNA3.75	0	1	1	0	0	0	0
11PNA3.86	0	1	1	0	0	0	0
11PNA3.90	0	1	1	0	0	0	0
11PNA4.101	0	1	1	0	0	0	0
11PNA4.110	0	1	1	0	0	0	0
11PNA4.116	0	1	1	0	0	0	0
11PNA4.129	0	1	1	0	0	0	0
328ME007	0	1	1	0	0	0	0
328ME032	0	1	1	0	0	0	0
328PNA032	0	1	1	0	0	0	0
328PNA047	0	1	1	0	0	0	0
328PNA051	0	1	1	0	0	0	0
328PNA054	0	1	1	0	0	0	0
328PNA057	0	1	1	0	0	0	0
328PNA064	0	1	1	0	0	0	0
627ME-13Y1	0	1	1	0	0	0	0
627ME-4MI1	0	1	1	0	0	0	0
627PNA-1Y1	0	1	1	0	0	0	0
627PNA-2B3	0	1	1	0	0	0	0
627PNA-3M4	0	1	1	0	0	0	0
Ale-Stenar-59-18	1	1	0	0	0	0	0
Aledal-6-49	1	1	0	0	0	0	0
Bor-15	1	1	0	0	0	0	0
Bor-17	1	1	0	0	0	0	0
Bor-2	1	1	0	0	0	0	0
Bor-9	1	1	0	0	0	0	0
Borky1	1	1	0	0	0	0	0
Borky2	1	1	0	0	0	0	0
Br-0	1	1	0	0	0	0	0
Brösarp-11-135	1	1	0	0	0	0	0
Buckhorn Pass	0	1	1	0	0	0	0
Cala-7	1	1	0	0	0	0	0
Cant-8	1	1	0	0	0	0	0
CON-6	0	1	1	0	0	0	0
CSHL-5	0	1	1	0	0	0	0
Cvi-0	0	1	1	0	0	0	0
Dem-4	0	1	1	0	0	0	0
Doubravnik1	1	1	0	0	0	0	0
Doubravnik10	1	1	0	0	0	0	0
Doubravnik14	1	1	0	0	0	0	0
Doubravnik18	1	1	0	0	0	0	0
Doubravnik4	1	1	0	0	0	0	0
Doubravnik6	1	1	0	0	0	0	0
Draha2	1	1	0	0	0	0	0
DraII-17	1	1	0	0	0	0	0
DraII-2	1	1	0	0	0	0	0
DraII-3	1	1	0	0	0	0	0
DraII-4	1	1	0	0	0	0	0
DraII-6	1	1	0	0	0	0	0
DraII-7	1	1	0	0	0	0	0
DraIII-17	1	1	0	0	0	0	0
DraIV 1-1	1	1	0	0	0	0	0
DraIV 1-11	1	1	0	0	0	0	0
DraIV 1-12	1	1	0	0	0	0	0
DraIV 1-13	1	1	0	0	0	0	0
DraIV 1-16	1	1	0	0	0	0	0
DraIV 1-6	1	1	0	0	0	0	0
DraIV 1-9	1	1	0	0	0	0	0
DraIV 2-1	1	1	0	0	0	0	0
DraIV 2-10	1	1	0	0	0	0	0
DraIV 2-12	1	1	0	0	0	0	0
DraIV 2-13	1	1	0	0	0	0	0
DraIV 2-16	1	1	0	0	0	0	0
DraIV 2-17	1	1	0	0	0	0	0
DraIV 2-2	1	1	0	0	0	0	0
DraIV 2-3	1	1	0	0	0	0	0
DraIV 2-4	1	1	0	0	0	0	0
DraIV 2-6	1	1	0	0	0	0	0
DraIV 2-7	1	1	0	0	0	0	0
DraIV 2-8	1	1	0	0	0	0	0
DraIV 3-1	1	1	0	0	0	0	0
DraIV 3-10	1	1	0	0	0	0	0
DraIV 3-12	1	1	0	0	0	0	0
DraIV 3-13	1	1	0	0	0	0	0
DraIV 3-2	1	1	0	0	0	0	0
DraIV 3-5	1	1	0	0	0	0	0
DraIV 3-6	1	1	0	0	0	0	0
DraIV 3-7	1	1	0	0	0	0	0
DraIV 3-8	1	1	0	0	0	0	0
DraIV 3-9	1	1	0	0	0	0	0
DraIV 4-1	1	1	0	0	0	0	0
DraIV 4-2	1	1	0	0	0	0	0
DraIV 4-3	1	1	0	0	0	0	0
DraIV 4-5	1	1	0	0	0	0	0
DraIV 4-8	1	1	0	0	0	0	0
DraIV 4-9	1	1	0	0	0	0	0
DraIV 5-1	1	1	0	0	0	0	0
DraIV 5-10	1	1	0	0	0	0	0
DraIV 5-16	1	1	0	0	0	0	0
DraIV 5-18	1	1	0	0	0	0	0
DraIV 5-19	1	1	0	0	0	0	0
DraIV 5-22	1	1	0	0	0	0	0
DraIV 5-24	1	1	0	0	0	0	0
DraIV 5-27	1	1	0	0	0	0	0
DraIV 5-3	1	1	0	0	0	0	0
DraIV 5-30	1	1	0	0	0	0	0
DraIV 5-32	1	1	0	0	0	0	0
DraIV 5-33	1	1	0	0	0	0	0
DraIV 5-35	1	1	0	0	0	0	0
DraIV 5-4	1	1	0	0	0	0	0
DraIV 5-7	1	1	0	0	0	0	0
DraIV 5-8	1	1	0	0	0	0	0
DraIV 6-1	1	1	0	0	0	0	0
DraIV 6-11	1	1	0	0	0	0	0
DraIV 6-12	1	1	0	0	0	0	0
DraIV 6-13	1	1	0	0	0	0	0
DraIV 6-17	1	1	0	0	0	0	0
DraIV 6-19	1	1	0	0	0	0	0
DraIV 6-20	1	1	0	0	0	0	0
DraIV 6-21	1	1	0	0	0	0	0
DraIV 6-22	1	1	0	0	0	0	0
DraIV 6-24	1	1	0	0	0	0	0
DraIV 6-26	1	1	0	0	0	0	0
DraIV 6-27	1	1	0	0	0	0	0
DraIV 6-28	1	1	0	0	0	0	0
DraIV 6-29	1	1	0	0	0	0	0
DraIV 6-33	1	1	0	0	0	0	0
DraIV 6-34	1	1	0	0	0	0	0
DraIV 6-37	1	1	0	0	0	0	0
DraIV 6-4	1	1	0	0	0	0	0
DraIV 6-8	1	1	0	0	0	0	0
FOR-5	0	1	1	0	0	0	0
Got-7	1	1	0	0	0	0	0
H55	1	1	0	0	0	0	0
KBS-Mac-15	0	1	1	0	0	0	0
KBS-Mac-16	0	1	1	0	0	0	0
KBS-Mac-17	0	1	1	0	0	0	0
KBS-Mac-23	0	1	1	0	0	0	0
KBS-Mac-28	0	1	1	0	0	0	0
KBS-Mac-33	0	1	1	0	0	0	0
KBS-Mac-41	0	1	1	0	0	0	0
KBS-Mac-43	0	1	1	0	0	0	0
KBS-Mac-53	0	1	1	0	0	0	0
KBS-Mac-58	0	1	1	0	0	0	0
KBS-Mac-64	0	1	1	0	0	0	0
KBS-Mac-72	0	1	1	0	0	0	0
KBS-Mac-73	0	1	1	0	0	0	0
KBS-Mac-75	0	1	1	0	0	0	0
KBS-Mac-76	0	1	1	0	0	0	0
KBS-Mac-78	0	1	1	0	0	0	0
KBS-Mac-8	0	1	1	0	0	0	0
KBS-Mac-88	0	1	1	0	0	0	0
KBS-Mac-89	0	1	1	0	0	0	0
KBS-Mac-91	0	1	1	0	0	0	0
KBS-Mac-95	0	1	1	0	0	0	0
KBS-Mac-96	0	1	1	0	0	0	0
Ker-38	0	1	1	0	0	0	0
Kno-10	0	1	1	0	0	0	0
KNO-11	0	1	1	0	0	0	0
KNO1.37	0	1	1	0	0	0	0
KNO2.77	0	1	1	0	0	0	0
KYF-21	0	1	1	0	0	0	0
L-R-12	0	1	1	0	0	0	0
LI-OF-002	0	1	1	0	0	0	0
LI-OF-023	0	1	1	0	0	0	0
LI-OF-042	0	1	1	0	0	0	0
LI-OF-060	0	1	1	0	0	0	0
LI-OF-066	0	1	1	0	0	0	0
LI-OF-094	0	1	1	0	0	0	0
LI-OF-095	0	1	1	0	0	0	0
LI-SET-009	0	1	1	0	0	0	0
Map-42	0	1	1	0	0	0	0
MAW-7	0	1	1	0	0	0	0
Mdn-1	0	1	1	0	0	0	0
ME3.41	0	1	1	0	0	0	0
ME3.51	0	1	1	0	0	0	0
ME4.20	0	1	1	0	0	0	0
MNF-Che-2	0	1	1	0	0	0	0
MNF-Che-3	0	1	1	0	0	0	0
MNF-Che-36	0	1	1	0	0	0	0
MNF-Che-41	0	1	1	0	0	0	0
MNF-Che-45	0	1	1	0	0	0	0
MNF-Che-58	0	1	1	0	0	0	0
MNF-Jac-2	0	1	1	0	0	0	0
MNF-Jac-21	0	1	1	0	0	0	0
MNF-Jac-22	0	1	1	0	0	0	0
MNF-Jac-26	0	1	1	0	0	0	0
MNF-Jac-30	0	1	1	0	0	0	0
MNF-Jac-31	0	1	1	0	0	0	0
MNF-Jac-32	0	1	1	0	0	0	0
MNF-Jac-34	0	1	1	0	0	0	0
MNF-Jac-68	0	1	1	0	0	0	0
MNF-Jac-9	0	1	1	0	0	0	0
MNF-Pin-2	0	1	1	0	0	0	0
MNF-Pin-31	0	1	1	0	0	0	0
MNF-Pin-39	0	1	1	0	0	0	0
MNF-Pin-43	0	1	1	0	0	0	0
MNF-Pin-44	0	1	1	0	0	0	0
MNF-Pot-21	0	1	1	0	0	0	0
MNF-Pot-46	0	1	1	0	0	0	0
MNF-Pot-47	0	1	1	0	0	0	0
MNF-Pot-48	0	1	1	0	0	0	0
MNF-Pot-56	0	1	1	0	0	0	0
MNF-Pot-60	0	1	1	0	0	0	0
MNF-Pot-61	0	1	1	0	0	0	0
MNF-Pot-68	0	1	1	0	0	0	0
MNF-Pot-69	0	1	1	0	0	0	0
MNF-Pot-75	0	1	1	0	0	0	0
MNF-Pot-76	0	1	1	0	0	0	0
MNF-Pot-79	0	1	1	0	0	0	0
MNF-Pot-8	0	1	1	0	0	0	0
MNF-Pot-80	0	1	1	0	0	0	0
MNF-Riv-67	0	1	1	0	0	0	0
Mt-0	0	1	1	0	0	0	0
Navajo-5	1	1	0	0	0	0	0
Paw-1	0	1	1	0	0	0	0
Paw-11	0	1	1	0	0	0	0
Paw-14	0	1	1	0	0	0	0
Paw-26	0	1	1	0	0	0	0
Paw-3	0	1	1	0	0	0	0
Paw-31	0	1	1	0	0	0	0
Paw-4	0	1	1	0	0	0	0
Paw-40	0	1	1	0	0	0	0
Pent-1	0	1	1	0	0	0	0
Pent-22	0	1	1	0	0	0	0
Pent-30	0	1	1	0	0	0	0
Pent-49	0	1	1	0	0	0	0
Puent-4	1	1	0	0	0	0	0
Rmx-A180	0	1	1	0	0	0	0
RMX3.11	0	1	1	0	0	0	0
RMX413.1	0	1	1	0	0	0	0
RMX413.12	0	1	1	0	0	0	0
RMX413.16	0	1	1	0	0	0	0
RMX413.17	0	1	1	0	0	0	0
RMX413.2	0	1	1	0	0	0	0
RMX413.20	0	1	1	0	0	0	0
RMX413.21	0	1	1	0	0	0	0
RMX413.24	0	1	1	0	0	0	0
RMX413.25	0	1	1	0	0	0	0
RMX413.29	0	1	1	0	0	0	0
RMX413.30	0	1	1	0	0	0	0
RMX413.31	0	1	1	0	0	0	0
RMX413.32	0	1	1	0	0	0	0
RMX413.4	0	1	1	0	0	0	0
RMX413.48	0	1	1	0	0	0	0
RMX413.51	0	1	1	0	0	0	0
RMX413.57	0	1	1	0	0	0	0
RMX413.6	0	1	1	0	0	0	0
RMX413.62	0	1	1	0	0	0	0
RMX413.63	0	1	1	0	0	0	0
RMX413.66	0	1	1	0	0	0	0
RMX413.69	0	1	1	0	0	0	0
RMX413.7	0	1	1	0	0	0	0
RMXF413.10	0	1	1	0	0	0	0
RMXF413.15	0	1	1	0	0	0	0
RMXF413.6	0	1	1	0	0	0	0
Rubezhnoe-1	1	1	0	0	0	0	0
San Martin-1	1	1	0	0	0	0	0
Sku-30	1	1	0	0	0	0	0
SLSP-30	0	1	1	0	0	0	0
SLSP-58	0	1	1	0	0	0	0
SLSP-72	0	1	1	0	0	0	0
Spro 3	1	1	0	0	0	0	0
Stabby-26	1	1	0	0	0	0	0
Ste-15	0	1	1	0	0	0	0
Ste-3	0	1	1	0	0	0	0
Ste-37	0	1	1	0	0	0	0
Ste-6	0	1	1	0	0	0	0
Ste-9	0	1	1	0	0	0	0
Tos-95-393	1	1	0	0	0	0	0
Udu-9	1	1	0	0	0	0	0
UduI 1-25	1	1	0	0	0	0	0
UduI 4-16	1	1	0	0	0	0	0
UduI 4-17	1	1	0	0	0	0	0
UduI 4-18	1	1	0	0	0	0	0
UduI 4-9	1	1	0	0	0	0	0
UKID25	1	1	0	0	0	0	0
UKID3	1	1	0	0	0	0	0
UKID76	1	1	0	0	0	0	0
UKSE06-547	1	1	0	0	0	0	0
UKSW06-158	1	1	0	0	0	0	0
WAR	0	1	1	0	0	0	0
Wilcox-16	0	1	1	0	0	0	0
Wilcox-4	0	1	1	0	0	0	0
Wilcox-41	0	1	1	0	0	0	0
Yo-0	0	1	1	0	0	0	0
Zdarec2	1	1	0	0	0	0	0
Zdarec3	1	1	0	0	0	0	0
Zdr-13	1	1	0	0	0	0	0
Zdr-16	1	1	0	0	0	0	0
Zdr-19	1	1	0	0	0	0	0
ZdrI 1-8	1	1	0	0	0	0	0
ZdrI 2-1	1	1	0	0	0	0	0
ZdrI 2-10	1	1	0	0	0	0	0
ZdrI 2-11	1	1	0	0	0	0	0
ZdrI 2-20	1	1	0	0	0	0	0
ZdrI 2-21	1	1	0	0	0	0	0
ZdrI 2-22	1	1	0	0	0	0	0
ZdrI 2-28	1	1	0	0	0	0	0
ZdrI 2-30	1	1	0	0	0	0	0
ZdrI 2-32	1	1	0	0	0	0	0
ZdrI 2-36	1	1	0	0	0	0	0
Ba-1	0	0	1	1	0	0	0
Col-0	0	0	0	1	1	0	0
Ct-1	0	0	1	1	0	0	0
Da-0	0	0	1	1	0	0	0
Dr-0	0	0	1	1	0	0	0
Ei-4	0	0	1	1	0	0	0
Eil-0	0	0	1	1	0	0	0
El-0	0	0	1	1	0	0	0
En-1	0	0	1	1	0	0	0
Gie-0	0	0	1	1	0	0	0
Hodja-Obi-Garm	0	1	1	0	0	0	0
Jm-0	0	0	1	1	0	0	0
Kil-0	0	0	1	1	0	0	0
La-1	0	0	1	1	0	0	0
Ler-1	0	0	0	1	0	1	0
Li-2:1	0	0	1	1	0	0	0
Me-0	0	0	1	1	0	0	0
Mr-0	0	0	1	1	0	0	0
Na-1	0	0	1	1	0	0	0
Np-0	0	0	1	1	0	0	0
Ove-0	0	0	1	1	0	0	0
Pf-0	0	0	1	1	0	0	0
Pt-0	0	0	1	1	0	0	0
Pu2-7	0	0	1	1	0	0	0
Rou-0	0	0	1	1	0	0	0
Sei-0	0	0	1	1	0	0	0
Spr1-2	0	0	1	1	0	0	0
St-0	0	0	1	1	0	0	0
Tsu-1	0	0	1	1	0	0	0
Tu-0	0	0	1	1	0	0	0
Wc-2	0	0	1	1	0	0	0
Wil-1-Dean-Lab	0	1	1	0	0	0	0
Ws-2	0	0	0	1	0	1	0
Nz1	0	1	0	0	0	0	0
Rmx-A02	0	1	0	0	0	0	0
Sapporo-0	0	0	1	0	0	0	0
Tsu-0	0	0	1	0	0	0	0
Ale1-2	0	0	1	0	0	0	0
ALL1-2	0	0	1	0	0	0	0
ALL1-5	0	0	1	0	0	0	0
ALL2-1	0	0	1	0	0	0	0
Amel-1	0	0	1	0	0	0	0
An-2	0	0	1	0	0	0	0
Asp-1	0	0	1	0	0	0	0
Bå1-2	0	0	1	0	0	0	0
Bch-3	0	0	1	0	0	0	0
Bch-4	0	0	1	0	0	0	0
Be-1	0	0	1	0	0	0	0
Brösarp-15-138	0	0	1	0	0	0	0
Brösarp-37-149	0	0	1	0	0	0	0
Brösarp-63-163	0	0	1	0	0	0	0
CLA-7	0	0	1	0	0	0	0
Cul-1	0	0	1	0	0	0	0
CUR-4	0	0	1	0	0	0	0
Da(1)-12	0	1	0	0	0	0	0
Edi-1	0	0	1	0	0	0	0
Est-0	0	0	1	0	0	0	0
Ga-2	0	0	1	0	0	0	0
Gårdby-17-198	0	0	1	0	0	0	0
Gr-1	0	0	1	0	0	0	0
Gr-5	0	0	1	0	0	0	0
Ha-0	0	0	1	0	0	0	0
Hov2-1	0	0	1	0	0	0	0
Je-0	0	0	1	0	0	0	0
JEA	0	0	1	0	0	0	0
Kin-0	0	0	1	0	0	0	0
Kl-0	0	0	0	1	0	0	0
Kl-5	0	0	1	0	0	0	0
Kyl-1	0	0	1	0	0	0	0
LDV-44	0	0	1	0	0	0	0
LDV-70	0	0	1	0	0	0	0
Li-3	0	0	1	0	0	0	0
Li-7	0	0	1	0	0	0	0
Liarum	0	0	1	0	0	0	0
Lis-1	0	0	1	0	0	0	0
Ma-0	0	0	0	1	0	0	0
Ma-2	0	0	1	0	0	0	0
PAR-5	0	0	1	0	0	0	0
Po-1	0	0	1	0	0	0	0
Pog-0	0	0	1	0	0	0	0
PT2.21	0	0	1	0	0	0	0
Puk 1	0	0	1	0	0	0	0
RAN	0	0	1	0	0	0	0
Ri-0	0	0	1	0	0	0	0
Seattle-0	0	0	1	0	0	0	0
Set-1	0	0	1	0	0	0	0
Sr:5	0	0	1	0	0	0	0
Ste 4	0	0	1	0	0	0	0
T480	0	0	1	0	0	0	0
Ta-0	0	0	0	1	0	0	0
Ting-1	0	0	1	0	0	0	0
TOU-A1-45	0	0	1	0	0	0	0
TOU-A1-68	0	0	1	0	0	0	0
TOU-A1-70	0	0	1	0	0	0	0
TOU-C-3	0	0	1	0	0	0	0
TOU-F-1	0	0	1	0	0	0	0
Tu-1	0	0	1	0	0	0	0
Ull3-4	0	0	1	0	0	0	0
Västervik	0	0	1	0	0	0	0
VOU-5	0	0	1	0	0	0	0
Ws	0	0	0	1	0	0	0
Can	0	0	0	0	1	0	0
Cvi	0	0	0	0	1	0	0
Ler	0	0	0	0	1	0	0
Nd	0	0	0	0	1	0	0
Rsch	0	0	0	0	1	0	0
Te	0	0	0	0	1	0	0
Col-2	0	0	0	0	0	1	0
Agu-1	0	0	0	0	0	0	1
Bak-2	0	0	0	0	0	0	1
Bak-7	0	0	0	0	0	0	1
Cdm-0	0	0	0	0	0	0	1
Del-10	0	0	0	0	0	0	1
Dog-4	0	0	0	0	0	0	1
Don-0	0	0	0	0	0	0	1
Ey15-2	0	0	0	0	0	0	1
HKT2.4	0	0	0	0	0	0	1
ICE1	0	0	0	0	0	0	1
ICE102	0	0	0	0	0	0	1
ICE104	0	0	0	0	0	0	1
ICE106	0	0	0	0	0	0	1
ICE107	0	0	0	0	0	0	1
ICE111	0	0	0	0	0	0	1
ICE112	0	0	0	0	0	0	1
ICE119	0	0	0	0	0	0	1
ICE120	0	0	0	0	0	0	1
ICE127	0	0	0	0	0	0	1
ICE130	0	0	0	0	0	0	1
ICE134	0	0	0	0	0	0	1
ICE138	0	0	0	0	0	0	1
ice150	0	0	0	0	0	0	1
ICE152	0	0	0	0	0	0	1
ICE153	0	0	0	0	0	0	1
ICE163	0	0	0	0	0	0	1
ICE169	0	0	0	0	0	0	1
ICE173	0	0	0	0	0	0	1
ICE181	0	0	0	0	0	0	1
ICE21	0	0	0	0	0	0	1
ICE212	0	0	0	0	0	0	1
ICE213	0	0	0	0	0	0	1
ICE216	0	0	0	0	0	0	1
ICE226	0	0	0	0	0	0	1
ICE228	0	0	0	0	0	0	1
ICE29	0	0	0	0	0	0	1
ICE33	0	0	0	0	0	0	1
ICE36	0	0	0	0	0	0	1
ICE49	0	0	0	0	0	0	1
ICE50	0	0	0	0	0	0	1
ICE60	0	0	0	0	0	0	1
ICE61	0	0	0	0	0	0	1
ICE63	0	0	0	0	0	0	1
ICE7	0	0	0	0	0	0	1
ICE70	0	0	0	0	0	0	1
ICE71	0	0	0	0	0	0	1
ICE72	0	0	0	0	0	0	1
ICE73	0	0	0	0	0	0	1
ICE75	0	0	0	0	0	0	1
ICE79	0	0	0	0	0	0	1
ICE91	0	0	0	0	0	0	1
ICE92	0	0	0	0	0	0	1
ICE93	0	0	0	0	0	0	1
ICE97	0	0	0	0	0	0	1
ICE98	0	0	0	0	0	0	1
Istisu-1	0	0	0	0	0	0	1
Kastel-1	0	0	0	0	0	0	1
Koch-1	0	0	0	0	0	0	1
Lag2.2	0	0	0	0	0	0	1
Leo-1	0	0	0	0	0	0	1
Lerik1-3	0	0	0	0	0	0	1
Mer-6	0	0	0	0	0	0	1
Nemrut-1	0	0	0	0	0	0	1
Nie1-2	0	0	0	0	0	0	1
Ped-0	0	0	0	0	0	0	1
Pra-6	0	0	0	0	0	0	1
Qui-0	0	0	0	0	0	0	1
Rue3-1-31	0	0	0	0	0	0	1
Sha	0	0	0	0	0	0	1
Star-8	0	0	0	0	0	0	1
TueSB30-3	0	0	0	0	0	0	1
Tuescha9	0	0	0	0	0	0	1
TueV13	0	0	0	0	0	0	1
TueWa1-2	0	0	0	0	0	0	1
Vash-1	0	0	0	0	0	0	1
Vie-0	0	0	0	0	0	0	1
WalhaesB4	0	0	0	0	0	0	1
Xan-1	0	0	0	0	0	0	1
Yeg-1	0	0	0	0	0	0	1
Total	1003	1193	1144	157	9	17	80
